# Supplementary material for: Molecular profiling of peripheral blood is associated with circulating tumor cells content and poor survival in metastatic castration-resistant prostate cancer
Source: PubMed Central journal article supplement (PMC4496379; doi:10.18632/oncotarget.3550), 2015-03-12
Supplement: oncotarget-06-10604-s001.pdf [file oncotarget-06-10604-s001.pdf]

## Molecular profiling of peripheral blood is associated with circulating tumor cells content and poor survival in metastatic castration-resistant prostate cancer

### Supplementary Material

**Supplementary Table S1:** Genes differentially expressed between  $\geq 5$  CTCs and  $< 5$  CTCs and their corresponding Fold change; FC: Fold change; FDR: False discovery rate.

| Probe ID  | Gene symbol   | Gene name                                                                                                   | FC    | FDR (%) |
|-----------|---------------|-------------------------------------------------------------------------------------------------------------|-------|---------|
| 3240_at   | <i>HP</i>     | haptoglobin                                                                                                 | 4.093 | 0.3916  |
| 1116_at   | <i>CHI3L1</i> | chitinase 3-like 1 (cartilage glycoprotein-39)                                                              | 3.580 | 0.3916  |
| 4973_at   | <i>OLR1</i>   | oxidized low density lipoprotein (lectin-like) receptor 1                                                   | 3.482 | 0.3916  |
| 10321_at  | <i>CRISP3</i> | cysteine-rich secretory protein 3                                                                           | 3.418 | 1.0624  |
| 4318_at   | <i>MMP9</i>   | matrix metalloproteinase 9 (gelatinase B, 92kDa gelatinase, 92kDa type IV collagenase)                      | 3.288 | 0.7929  |
| 6521_at   | <i>SLC4A1</i> | solute carrier family 4, anion exchanger, member 1 (erythrocyte membrane protein band 3, Diego blood group) | 3.283 | 2.5934  |
| 57126_at  | <i>CD177</i>  | CD177 molecule                                                                                              | 3.271 | 0.6156  |
| 2993_at   | <i>GYPA</i>   | glycophorin A (MNS blood group)                                                                             | 3.243 | 2.5934  |
| 2994_at   | <i>GYPB</i>   | glycophorin B (MNS blood group)                                                                             | 3.192 | 2.3410  |
| 154664_at | <i>ABCA13</i> | ATP-binding cassette, sub-family A (ABC1), member 13                                                        | 3.124 | 1.0624  |
| 383_at    | <i>ARG1</i>   | arginase, liver                                                                                             | 3.116 | 1.0624  |
| 51327_at  | <i>AHSP</i>   | alpha hemoglobin stabilizing protein                                                                        | 3.110 | 2.5934  |
| 820_at    | <i>CAMP</i>   | cathelicidin antimicrobial peptide                                                                          | 3.090 | 0.3916  |
| 439996_at | <i>IFIT1L</i> | interferon-induced protein with tetratricopeptide repeats 1-like                                            | 3.066 | 2.3410  |
| 4317_at   | <i>MMP8</i>   | matrix metalloproteinase 8 (neutrophil collagenase)                                                         | 3.007 | 1.7031  |
| 6590_at   | <i>SLPI</i>   | secretory leukocyte peptidase inhibitor                                                                     | 2.917 | 0.6156  |
| 4051_at   | <i>CYP4F3</i> | cytochrome P450, family 4, subfamily F, polypeptide 3                                                       | 2.890 | 0.6156  |
| 10562_at  | <i>OLFM4</i>  | olfactomedin 4                                                                                              | 2.852 | 2.2070  |

|           |                  |                                                                                                 |       |        |
|-----------|------------------|-------------------------------------------------------------------------------------------------|-------|--------|
| 759_at    | <i>CA1</i>       | carbonic anhydrase I                                                                            | 2.843 | 4.4952 |
| 1118_at   | <i>CHIT1</i>     | chitinase 1 (chitotriosidase)                                                                   | 2.839 | 1.0142 |
| 212_at    | <i>ALAS2</i>     | aminolevulinate, delta-, synthase 2                                                             | 2.836 | 4.0068 |
| 306_at    | <i>ANXA3</i>     | annexin A3                                                                                      | 2.818 | 1.0624 |
| 8991_at   | <i>SELENBP1</i>  | selenium binding protein 1                                                                      | 2.807 | 2.5934 |
| 4057_at   | <i>LTF</i>       | lactotransferrin                                                                                | 2.782 | 1.9145 |
| 6947_at   | <i>TCN1</i>      | transcobalamin I (vitamin B12 binding protein, R binder family)                                 | 2.761 | 1.1053 |
| 5273_at   | <i>SERPINB10</i> | serpin peptidase inhibitor, clade B (ovalbumin), member 10                                      | 2.732 | 0.6156 |
| 5004_at   | <i>ORM1</i>      | orosomucoid 1                                                                                   | 2.716 | 0.7929 |
| 634_at    | <i>CEACAM1</i>   | carcinoembryonic antigen-related cell adhesion molecule 1 (biliary glycoprotein)                | 2.694 | 1.0142 |
| 2038_at   | <i>EPB42</i>     | erythrocyte membrane protein band 4.2                                                           | 2.645 | 2.5934 |
| 7111_at   | <i>TMOD1</i>     | tropomodulin 1                                                                                  | 2.620 | 1.1053 |
| 57633_at  | <i>LRRN1</i>     | leucine rich repeat neuronal 1                                                                  | 2.576 | 0.3916 |
| 1991_at   | <i>ELANE</i>     | elastase, neutrophil expressed                                                                  | 2.545 | 1.1053 |
| 8993_at   | <i>PGLYRP1</i>   | peptidoglycan recognition protein 1                                                             | 2.511 | 1.1053 |
| 1088_at   | <i>CEACAM8</i>   | carcinoembryonic antigen-related cell adhesion molecule 8                                       | 2.506 | 2.3410 |
| 3250_at   | <i>HPR</i>       | haptoglobin-related protein                                                                     | 2.501 | 0.3916 |
| 2078_at   | <i>ERG</i>       | v-ets erythroblastosis virus E26 oncogene homolog (avian)                                       | 2.493 | 0.3916 |
| 671_at    | <i>BPI</i>       | bactericidal/permeability-increasing protein                                                    | 2.449 | 1.7031 |
| 222487_at | <i>GPR97</i>     | G protein-coupled receptor 97                                                                   | 2.437 | 0.3916 |
| 1511_at   | <i>CTSG</i>      | cathepsin G                                                                                     | 2.437 | 1.9145 |
| 4680_at   | <i>CEACAM6</i>   | carcinoembryonic antigen-related cell adhesion molecule 6 (non-specific cross reacting antigen) | 2.396 | 2.5934 |
| 81442_at  | <i>OR6N2</i>     | olfactory receptor, family 6, subfamily N, member 2                                             | 2.391 | 0.3916 |
| 3624_at   | <i>INHBA</i>     | inhibin, beta A                                                                                 | 2.374 | 0.3916 |

|              |                 |                                                                                  |       |        |
|--------------|-----------------|----------------------------------------------------------------------------------|-------|--------|
| 5657_at      | <i>PRTN3</i>    | proteinase 3                                                                     | 2.372 | 0.6156 |
| 566_at       | <i>AZU1</i>     | azurocidin 1                                                                     | 2.371 | 1.5110 |
| 100133941_at | <i>CD24</i>     | CD24 molecule                                                                    | 2.361 | 1.0142 |
| 1669_at      | <i>DEFA4</i>    | defensin, alpha 4, corticostatin                                                 | 2.330 | 4.0068 |
| 4353_at      | <i>MPO</i>      | myeloperoxidase                                                                  | 2.319 | 1.9145 |
| 653198_at    | <i>NA</i>       | NA                                                                               | 2.317 | 0.3916 |
| 6286_at      | <i>S100P</i>    | S100 calcium binding protein P                                                   | 2.299 | 1.0624 |
| 3680_at      | <i>ITGA9</i>    | integrin, alpha 9                                                                | 2.298 | 0.3916 |
| 3934_at      | <i>LCN2</i>     | lipocalin 2                                                                      | 2.282 | 1.0142 |
| 3045_at      | <i>HBD</i>      | hemoglobin, delta                                                                | 2.271 | 2.3410 |
| 3042_at      | <i>HBM</i>      | hemoglobin, mu                                                                   | 2.257 | 4.0068 |
| 8972_at      | <i>MGAM</i>     | maltase-glucoamylase (alpha-glucosidase)                                         | 2.238 | 1.1053 |
| 391114_at    | <i>OR6K3</i>    | olfactory receptor, family 6, subfamily K, member 3                              | 2.227 | 0.3916 |
| 5909_at      | <i>RAP1GAP</i>  | RAP1 GTPase activating protein                                                   | 2.199 | 5.4721 |
| 56729_at     | <i>RETN</i>     | resistin                                                                         | 2.171 | 0.3916 |
| 128372_at    | <i>OR6N1</i>    | olfactory receptor, family 6, subfamily N, member 1                              | 2.165 | 0.3916 |
| 6037_at      | <i>RNASE3</i>   | ribonuclease, RNase A family, 3 (eosinophil cationic protein)                    | 2.155 | 1.5110 |
| 116369_at    | <i>SLC26A8</i>  | solute carrier family 26, member 8                                               | 2.123 | 0.3916 |
| 932_at       | <i>MS4A3</i>    | membrane-spanning 4-domains, subfamily A, member 3 (hematopoietic cell-specific) | 2.119 | 1.7031 |
| 284422_at    | <i>C19orf77</i> | chromosome 19 open reading frame 77                                              | 2.119 | 1.0142 |
| 26499_at     | <i>PLEK2</i>    | pleckstrin 2                                                                     | 2.118 | 1.5110 |
| 2334_at      | <i>AFF2</i>     | AF4/FMR2 family, member 2                                                        | 2.113 | 0.6156 |
| 148534_at    | <i>TMEM56</i>   | transmembrane protein 56                                                         | 2.106 | 1.7031 |
| 10900_at     | <i>RUNDC3A</i>  | RUN domain containing 3A                                                         | 2.095 | 3.3639 |

|           |                  |                                                                                                                                           |       |        |
|-----------|------------------|-------------------------------------------------------------------------------------------------------------------------------------------|-------|--------|
| 23601_at  | <i>CLEC5A</i>    | C-type lectin domain family 5, member A                                                                                                   | 2.090 | 0.6156 |
| 7180_at   | <i>CRISP2</i>    | cysteine-rich secretory protein 2                                                                                                         | 2.068 | 0.3916 |
| 2235_at   | <i>FECH</i>      | ferrochelatase (protoporphyrin)                                                                                                           | 2.051 | 2.9821 |
| 64078_at  | <i>SLC28A3</i>   | solute carrier family 28 (sodium-coupled nucleoside transporter), member 3                                                                | 2.050 | 0.3916 |
| 162466_at | <i>PHOSPHO1</i>  | phosphatase, orphan 1                                                                                                                     | 2.050 | 6.4318 |
| 4070_at   | <i>TACSTD2</i>   | tumor-associated calcium signal transducer 2                                                                                              | 2.043 | 1.0624 |
| 8218_at   | <i>CLTCL1</i>    | clathrin, heavy chain-like 1                                                                                                              | 2.028 | 0.3916 |
| 7298_at   | <i>TYMS</i>      | thymidylate synthetase                                                                                                                    | 2.026 | 0.3916 |
| 11001_at  | <i>SLC27A2</i>   | solute carrier family 27 (fatty acid transporter), member 2                                                                               | 2.003 | 0.3916 |
| 54443_at  | <i>ANLN</i>      | anillin, actin binding protein                                                                                                            | 2.001 | 0.6156 |
| 118932_at | <i>ANKRD22</i>   | ankyrin repeat domain 22                                                                                                                  | 1.998 | 1.7031 |
| 253012_at | <i>HEPACAM2</i>  | HEPACAM family member 2                                                                                                                   | 1.997 | 8.3194 |
| 1602_at   | <i>DACH1</i>     | dachshund homolog 1 (Drosophila)                                                                                                          | 1.997 | 0.3916 |
| 51312_at  | <i>SLC25A37</i>  | solute carrier family 25, member 37                                                                                                       | 1.994 | 1.5110 |
| 4288_at   | <i>MKI67</i>     | antigen identified by monoclonal antibody Ki-67                                                                                           | 1.971 | 0.6156 |
| 688_at    | <i>KLF5</i>      | Kruppel-like factor 5 (intestinal)                                                                                                        | 1.971 | 0.3916 |
| 660_at    | <i>BMX</i>       | BMX non-receptor tyrosine kinase                                                                                                          | 1.965 | 1.0142 |
| 643332_at | <i>LOC643332</i> | similar to Nonsecretory ribonuclease precursor (Ribonuclease US) (Eosinophil-derived neurotoxin) (RNase Upl-2) (Ribonuclease 2) (RNase 2) | 1.955 | 0.3916 |
| 10112_at  | <i>KIF20A</i>    | kinesin family member 20A                                                                                                                 | 1.937 | 0.3916 |
| 9914_at   | <i>ATP2C2</i>    | ATPase, Ca <sup>++</sup> transporting, type 2C, member 2                                                                                  | 1.936 | 0.3916 |
| 23762_at  | <i>OSBP2</i>     | oxysterol binding protein 2                                                                                                               | 1.934 | 3.3639 |
| 6708_at   | <i>SPTA1</i>     | spectrin, alpha, erythrocytic 1 (elliptocytosis 2)                                                                                        | 1.931 | 2.5934 |
| 25853_at  | <i>DCAF12</i>    | DDB1 and CUL4 associated factor 12                                                                                                        | 1.930 | 1.5110 |

|           |                 |                                                                              |       |        |
|-----------|-----------------|------------------------------------------------------------------------------|-------|--------|
| 54682_at  | <i>MANSC1</i>   | MANSC domain containing 1                                                    | 1.919 | 1.7031 |
| 8987_at   | <i>STBD1</i>    | starch binding domain 1                                                      | 1.914 | 0.3916 |
| 6005_at   | <i>RHAG</i>     | Rh-associated glycoprotein                                                   | 1.910 | 3.4989 |
| 6535_at   | <i>SLC6A8</i>   | solute carrier family 6 (neurotransmitter transporter, creatine), member 8   | 1.907 | 2.9821 |
| 7153_at   | <i>TOP2A</i>    | topoisomerase (DNA) II alpha 170kDa                                          | 1.906 | 0.3916 |
| 23569_at  | <i>PADI4</i>    | peptidyl arginine deiminase, type IV                                         | 1.900 | 0.6156 |
| 55553_at  | <i>SOX6</i>     | SRY (sex determining region Y)-box 6                                         | 1.898 | 4.9964 |
| 51629_at  | <i>SLC25A39</i> | solute carrier family 25, member 39                                          | 1.898 | 2.5934 |
| 440603_at | <i>BCL2L15</i>  | BCL2-like 15                                                                 | 1.897 | 0.3916 |
| 6518_at   | <i>SLC2A5</i>   | solute carrier family 2 (facilitated glucose/fructose transporter), member 5 | 1.895 | 0.6156 |
| 7357_at   | <i>UGCG</i>     | UDP-glucose ceramide glucosyltransferase                                     | 1.890 | 0.3916 |
| 253650_at | <i>ANKRD18A</i> | ankyrin repeat domain 18A                                                    | 1.889 | 0.6156 |
| 9768_at   | <i>KIAA0101</i> | KIAA0101                                                                     | 1.877 | 0.3916 |
| 84418_at  | <i>C5orf32</i>  | chromosome 5 open reading frame 32                                           | 1.876 | 0.3916 |
| 2335_at   | <i>FN1</i>      | fibronectin 1                                                                | 1.851 | 2.9821 |
| 6319_at   | <i>SCD</i>      | stearoyl-CoA desaturase (delta-9-desaturase)                                 | 1.846 | 0.3916 |
| 55137_at  | <i>FIGN</i>     | fidgetin                                                                     | 1.840 | 2.2070 |
| 85413_at  | <i>SLC22A16</i> | solute carrier family 22 (organic cation/carnitine transporter), member 16   | 1.840 | 0.3916 |
| 53831_at  | <i>GPR84</i>    | G protein-coupled receptor 84                                                | 1.840 | 0.7929 |
| 669_at    | <i>BPGM</i>     | 2,3-bisphosphoglycerate mutase                                               | 1.832 | 4.4952 |
| 5475_at   | <i>PPEF1</i>    | protein phosphatase, EF-hand calcium binding domain 1                        | 1.807 | 0.3916 |
| 22974_at  | <i>TPX2</i>     | TPX2, microtubule-associated, homolog ( <i>Xenopus laevis</i> )              | 1.805 | 0.6156 |
| 115330_at | <i>GPR146</i>   | G protein-coupled receptor 146                                               | 1.801 | 4.9964 |
| 79895_at  | <i>ATP8B4</i>   | ATPase, class I, type 8B, member 4                                           | 1.794 | 0.3916 |

|           |                 |                                                                                 |       |        |
|-----------|-----------------|---------------------------------------------------------------------------------|-------|--------|
| 7130_at   | <i>TNFAIP6</i>  | tumor necrosis factor, alpha-induced protein 6                                  | 1.794 | 2.5934 |
| 200132_at | <i>TCTEX1D1</i> | Tctex1 domain containing 1                                                      | 1.793 | 1.7031 |
| 286_at    | <i>ANK1</i>     | ankyrin 1, erythrocytic                                                         | 1.792 | 4.9964 |
| 4635_at   | <i>MYL4</i>     | myosin, light chain 4, alkali; atrial, embryonic                                | 1.788 | 6.4318 |
| 3145_at   | <i>HMBS</i>     | hydroxymethylbilane synthase                                                    | 1.784 | 1.7031 |
| 7102_at   | <i>TSPAN7</i>   | tetraspanin 7                                                                   | 1.772 | 6.9774 |
| 29128_at  | <i>UHRF1</i>    | ubiquitin-like with PHD and ring finger domains 1                               | 1.771 | 0.3916 |
| 1870_at   | <i>E2F2</i>     | E2F transcription factor 2                                                      | 1.756 | 2.2070 |
| 701_at    | <i>BUB1B</i>    | budding uninhibited by benzimidazoles 1 homolog beta (yeast)                    | 1.749 | 0.3916 |
| 6036_at   | <i>RNASE2</i>   | ribonuclease, RNase A family, 2 (liver, eosinophil-derived neurotoxin)          | 1.745 | 0.3916 |
| 2862_at   | <i>MLNR</i>     | motilin receptor                                                                | 1.739 | 1.1053 |
| 8358_at   | <i>HIST1H3B</i> | histone cluster 1, H3b                                                          | 1.734 | 1.0142 |
| 6536_at   | <i>SLC6A9</i>   | solute carrier family 6 (neurotransmitter transporter, glycine), member 9       | 1.733 | 4.0068 |
| 8825_at   | <i>LIN7A</i>    | lin-7 homolog A (C. elegans)                                                    | 1.733 | 0.3916 |
| 2200_at   | <i>FBN1</i>     | fibrillin 1                                                                     | 1.729 | 0.3916 |
| 94031_at  | <i>HTRA3</i>    | HtrA serine peptidase 3                                                         | 1.729 | 0.3916 |
| 3554_at   | <i>IL1R1</i>    | interleukin 1 receptor, type I                                                  | 1.728 | 0.3916 |
| 6241_at   | <i>RRM2</i>     | ribonucleotide reductase M2                                                     | 1.727 | 1.0624 |
| 5872_at   | <i>RAB13</i>    | RAB13, member RAS oncogene family                                               | 1.726 | 0.3916 |
| 7052_at   | <i>TGM2</i>     | transglutaminase 2 (C polypeptide, protein-glutamine-gamma-glutamyltransferase) | 1.724 | 4.4952 |
| 11240_at  | <i>PADI2</i>    | peptidyl arginine deiminase, type II                                            | 1.718 | 0.7929 |
| 6622_at   | <i>SNCA</i>     | synuclein, alpha (non A4 component of amyloid precursor)                        | 1.718 | 2.5934 |
| 143689_at | <i>PIWIL4</i>   | piwi-like 4 (Drosophila)                                                        | 1.713 | 0.3916 |
| 8447_at   | <i>DOC2B</i>    | double C2-like domains, beta                                                    | 1.713 | 0.3916 |

|           |                |                                                                      |       |        |
|-----------|----------------|----------------------------------------------------------------------|-------|--------|
| 9787_at   | <i>DLGAP5</i>  | discs, large (Drosophila) homolog-associated protein 5               | 1.712 | 0.3916 |
| 645_at    | <i>BLVRB</i>   | biliverdin reductase B (flavin reductase (NADPH))                    | 1.707 | 1.0142 |
| 1063_at   | <i>CENPF</i>   | centromere protein F, 350/400ka (mitosin)                            | 1.700 | 0.3916 |
| 51514_at  | <i>DTL</i>     | denticleless homolog (Drosophila)                                    | 1.699 | 1.1053 |
| 202243_at | <i>CCDC125</i> | coiled-coil domain containing 125                                    | 1.697 | 0.7929 |
| 29899_at  | <i>GPSM2</i>   | G-protein signaling modulator 2 (AGS3-like, C. elegans)              | 1.697 | 0.3916 |
| 983_at    | <i>CDK1</i>    | cyclin-dependent kinase 1                                            | 1.695 | 0.3916 |
| 129642_at | <i>MBOAT2</i>  | membrane bound O-acyltransferase domain containing 2                 | 1.695 | 1.0624 |
| 2996_at   | <i>GYPE</i>    | glycophorin E (MNS blood group)                                      | 1.692 | 4.9964 |
| 58528_at  | <i>RRAGD</i>   | Ras-related GTP binding D                                            | 1.691 | 0.3916 |
| 3832_at   | <i>KIF11</i>   | kinesin family member 11                                             | 1.690 | 0.7929 |
| 55711_at  | <i>FAR2</i>    | fatty acyl CoA reductase 2                                           | 1.689 | 0.6156 |
| 1084_at   | <i>CEACAM3</i> | carcinoembryonic antigen-related cell adhesion molecule 3            | 1.688 | 1.0624 |
| 84078_at  | <i>KBTBD7</i>  | kelch repeat and BTB (POZ) domain containing 7                       | 1.687 | 0.6156 |
| 56992_at  | <i>KIF15</i>   | kinesin family member 15                                             | 1.686 | 0.3916 |
| 4602_at   | <i>MYB</i>     | v-myb myeloblastosis viral oncogene homolog (avian)                  | 1.680 | 1.0624 |
| 8778_at   | <i>SIGLEC5</i> | sialic acid binding Ig-like lectin 5                                 | 1.677 | 0.6156 |
| 259266_at | <i>ASPM</i>    | asp (abnormal spindle) homolog, microcephaly associated (Drosophila) | 1.675 | 0.6156 |
| 5746_at   | <i>PTH2R</i>   | parathyroid hormone 2 receptor                                       | 1.675 | 0.3916 |
| 2305_at   | <i>FOXM1</i>   | forkhead box M1                                                      | 1.675 | 0.3916 |
| 1193_at   | <i>CLIC2</i>   | chloride intracellular channel 2                                     | 1.668 | 4.0068 |
| 54855_at  | <i>FAM46C</i>  | family with sequence similarity 46, member C                         | 1.667 | 6.4318 |
| 343171_at | <i>OR2W3</i>   | olfactory receptor, family 2, subfamily W, member 3                  | 1.662 | 9.0379 |
| 4784_at   | <i>NFIX</i>    | nuclear factor I/X (CCAAT-binding transcription factor)              | 1.660 | 1.0624 |

|           |                 |                                                                                 |       |        |
|-----------|-----------------|---------------------------------------------------------------------------------|-------|--------|
| 284415_at | <i>VSTM1</i>    | V-set and transmembrane domain containing 1                                     | 1.658 | 2.9821 |
| 90381_at  | <i>C15orf42</i> | chromosome 15 open reading frame 42                                             | 1.655 | 0.3916 |
| 5055_at   | <i>SERPINB2</i> | serpin peptidase inhibitor, clade B (ovalbumin), member 2                       | 1.654 | 0.3916 |
| 692087_at | <i>SNORD49B</i> | small nucleolar RNA, C/D box 49B                                                | 1.654 | 4.0068 |
| 5337_at   | <i>PLD1</i>     | phospholipase D1, phosphatidylcholine-specific                                  | 1.653 | 0.3916 |
| 58484_at  | <i>NLRC4</i>    | NLR family, CARD domain containing 4                                            | 1.653 | 0.7929 |
| 890_at    | <i>CCNA2</i>    | cyclin A2                                                                       | 1.652 | 0.6156 |
| 79733_at  | <i>E2F8</i>     | E2F transcription factor 8                                                      | 1.648 | 0.3916 |
| 54458_at  | <i>PRR13</i>    | proline rich 13                                                                 | 1.646 | 0.3916 |
| 3792_at   | <i>KEL</i>      | Kell blood group, metallo-endopeptidase                                         | 1.645 | 9.0379 |
| 199675_at | <i>C19orf59</i> | chromosome 19 open reading frame 59                                             | 1.639 | 0.3916 |
| 55859_at  | <i>BEX1</i>     | brain expressed, X-linked 1                                                     | 1.638 | 1.0624 |
| 5347_at   | <i>PLK1</i>     | polo-like kinase 1 (Drosophila)                                                 | 1.631 | 0.7929 |
| 51203_at  | <i>NUSAP1</i>   | nucleolar and spindle associated protein 1                                      | 1.626 | 0.6156 |
| 26577_at  | <i>PCOLCE2</i>  | procollagen C-endopeptidase enhancer 2                                          | 1.626 | 0.7929 |
| 3009_at   | <i>HIST1H1B</i> | histone cluster 1, H1b                                                          | 1.619 | 0.7929 |
| 8395_at   | <i>PIP5K1B</i>  | phosphatidylinositol-4-phosphate 5-kinase, type I, beta                         | 1.617 | 1.0624 |
| 6710_at   | <i>SPTB</i>     | spectrin, beta, erythrocytic                                                    | 1.617 | 7.6147 |
| 51218_at  | <i>GLRX5</i>    | glutaredoxin 5                                                                  | 1.616 | 2.9821 |
| 9928_at   | <i>KIF14</i>    | kinesin family member 14                                                        | 1.613 | 0.3916 |
| 3382_at   | <i>ICA1</i>     | islet cell autoantigen 1, 69kDa                                                 | 1.610 | 0.3916 |
| 55432_at  | <i>YOD1</i>     | YOD1 OTU deubiquinating enzyme 1 homolog ( <i>S. cerevisiae</i> )               | 1.610 | 2.5934 |
| 57556_at  | <i>SEMA6A</i>   | sema domain, transmembrane domain (TM), and cytoplasmic domain, (semaphorin) 6A | 1.609 | 0.6156 |
| 26996_at  | <i>GPR160</i>   | G protein-coupled receptor 160                                                  | 1.609 | 1.0624 |



|              |                     |                                                               |       |        |
|--------------|---------------------|---------------------------------------------------------------|-------|--------|
| 25801_at     | <i>GCA</i>          | grancalcin, EF-hand calcium binding protein                   | 1.603 | 0.3916 |
| 54757_at     | <i>FAM20A</i>       | family with sequence similarity 20, member A                  | 1.603 | 9.9658 |
| 116159_at    | <i>CYYR1</i>        | cysteine/tyrosine-rich 1                                      | 1.601 | 1.0624 |
| 272_at       | <i>AMPD3</i>        | adenosine monophosphate deaminase 3                           | 1.596 | 0.3916 |
| 100289137_at | <i>LOC100289137</i> | similar to hCG2010820                                         | 1.592 | 3.3639 |
| 64101_at     | <i>LRRC4</i>        | leucine rich repeat containing 4                              | 1.583 | 1.5110 |
| 8355_at      | <i>HIST1H3G</i>     | histone cluster 1, H3g                                        | 1.579 | 1.9145 |
| 2204_at      | <i>FCAR</i>         | Fc fragment of IgA, receptor for                              | 1.579 | 0.7929 |
| 116151_at    | <i>C20orf108</i>    | chromosome 20 open reading frame 108                          | 1.577 | 4.4952 |
| 11113_at     | <i>CIT</i>          | citron (rho-interacting, serine/threonine kinase 21)          | 1.571 | 0.7929 |
| 1089_at      | <i>CEACAM4</i>      | carcinoembryonic antigen-related cell adhesion molecule 4     | 1.570 | 1.0142 |
| 25893_at     | <i>TRIM58</i>       | tripartite motif-containing 58                                | 1.570 | 4.4952 |
| 3772_at      | <i>KCNJ15</i>       | potassium inwardly-rectifying channel, subfamily J, member 15 | 1.563 | 5.4721 |
| 150468_at    | <i>CKAP2L</i>       | cytoskeleton associated protein 2-like                        | 1.562 | 1.0624 |
| 9493_at      | <i>KIF23</i>        | kinesin family member 23                                      | 1.561 | 0.3916 |
| 51734_at     | <i>SEPX1</i>        | selenoprotein X, 1                                            | 1.561 | 0.3916 |
| 10158_at     | <i>PDZK1IP1</i>     | PDZK1 interacting protein 1                                   | 1.558 | 3.4989 |
| 2352_at      | <i>FOLR3</i>        | folate receptor 3 (gamma)                                     | 1.555 | 9.0379 |
| 2995_at      | <i>GYPC</i>         | glycophorin C (Gerbich blood group)                           | 1.553 | 4.4952 |
| 9134_at      | <i>CCNE2</i>        | cyclin E2                                                     | 1.551 | 1.0624 |
| 100049587_at | <i>SIGLEC14</i>     | sialic acid binding Ig-like lectin 14                         | 1.551 | 1.1053 |
| 199221_at    | <i>DZIP1L</i>       | DAZ interacting protein 1-like                                | 1.550 | 0.3916 |
| 7855_at      | <i>FZD5</i>         | frizzled homolog 5 (Drosophila)                               | 1.549 | 0.3916 |
| 253827_at    | <i>MSRB3</i>        | methionine sulfoxide reductase B3                             | 1.546 | 1.1053 |

|           |                  |                                                                            |       |        |
|-----------|------------------|----------------------------------------------------------------------------|-------|--------|
| 9133_at   | <i>CCNB2</i>     | cyclin B2                                                                  | 1.544 | 0.3916 |
| 9055_at   | <i>PRC1</i>      | protein regulator of cytokinesis 1                                         | 1.543 | 1.0142 |
| 2934_at   | <i>GSN</i>       | gelsolin (amyloidosis, Finnish type)                                       | 1.540 | 0.3916 |
| 150000_at | <i>ABCC13</i>    | ATP-binding cassette, sub-family C (CFTR/MRP), member 13                   | 1.539 | 4.9964 |
| 6196_at   | <i>RPS6KA2</i>   | ribosomal protein S6 kinase, 90kDa, polypeptide 2                          | 1.539 | 0.3916 |
| 221184_at | <i>CPNE2</i>     | copine II                                                                  | 1.538 | 0.3916 |
| 167555_at | <i>FAM151B</i>   | family with sequence similarity 151, member B                              | 1.538 | 0.3916 |
| 6035_at   | <i>RNASE1</i>    | ribonuclease, RNase A family, 1 (pancreatic)                               | 1.534 | 1.9145 |
| 338811_at | <i>FAM19A2</i>   | family with sequence similarity 19 (chemokine (C-C motif)-like), member A2 | 1.533 | 1.1053 |
| 285696_at | <i>LOC285696</i> | hypothetical LOC285696                                                     | 1.531 | 0.3916 |
| 25819_at  | <i>CCRN4L</i>    | CCR4 carbon catabolite repression 4-like ( <i>S. cerevisiae</i> )          | 1.530 | 1.0624 |
| 388507_at | <i>ZNF788</i>    | zinc finger family member 788                                              | 1.528 | 0.7929 |
| 10272_at  | <i>FSTL3</i>     | folliculin-like 3 (secreted glycoprotein)                                  | 1.527 | 0.3916 |
| 8613_at   | <i>PPAP2B</i>    | phosphatidic acid phosphatase type 2B                                      | 1.527 | 0.3916 |
| 56670_at  | <i>SUCNR1</i>    | succinate receptor 1                                                       | 1.525 | 2.5934 |
| 157570_at | <i>ESCO2</i>     | establishment of cohesion 1 homolog 2 ( <i>S. cerevisiae</i> )             | 1.524 | 1.1053 |
| 140803_at | <i>TRPM6</i>     | transient receptor potential cation channel, subfamily M, member 6         | 1.523 | 1.9145 |
| 699_at    | <i>BUB1</i>      | budding uninhibited by benzimidazoles 1 homolog (yeast)                    | 1.522 | 1.1053 |
| 85462_at  | <i>FHDC1</i>     | FH2 domain containing 1                                                    | 1.522 | 8.3194 |
| 9086_at   | <i>EIF1AY</i>    | eukaryotic translation initiation factor 1A, Y-linked                      | 1.519 | 4.9964 |
| 3142_at   | <i>HLX</i>       | H2.0-like homeobox                                                         | 1.519 | 0.3916 |
| 57082_at  | <i>CASC5</i>     | cancer susceptibility candidate 5                                          | 1.519 | 0.3916 |
| 2766_at   | <i>GMPR</i>      | guanosine monophosphate reductase                                          | 1.518 | 7.6147 |
| 598_at    | <i>BCL2L1</i>    | BCL2-like 1                                                                | 1.518 | 5.4721 |

|           |                  |                                                                                               |        |        |
|-----------|------------------|-----------------------------------------------------------------------------------------------|--------|--------|
| 22824_at  | <i>HSPA4L</i>    | heat shock 70kDa protein 4-like                                                               | 1.515  | 1.7031 |
| 966_at    | <i>CD59</i>      | CD59 molecule, complement regulatory protein                                                  | 1.513  | 1.0624 |
| 8794_at   | <i>TNFRSF10C</i> | tumor necrosis factor receptor superfamily, member 10c, decoy without an intracellular domain | 1.511  | 4.4952 |
| 3084_at   | <i>NRG1</i>      | neuregulin 1                                                                                  | 1.509  | 6.4318 |
| 2039_at   | <i>EPB49</i>     | erythrocyte membrane protein band 4.9 (dematin)                                               | 1.508  | 9.9658 |
| 1647_at   | <i>GADD45A</i>   | growth arrest and DNA-damage-inducible, alpha                                                 | 1.508  | 0.3916 |
| 84628_at  | <i>NTNG2</i>     | netrin G2                                                                                     | 1.504  | 1.9145 |
| 1053_at   | <i>CEBPE</i>     | CCAAT/enhancer binding protein (C/EBP), epsilon                                               | 1.502  | 0.7929 |
| 10170_at  | <i>DHRS9</i>     | dehydrogenase/reductase (SDR family) member 9                                                 | 1.501  | 1.7031 |
| 81563_at  | <i>C1orf21</i>   | chromosome 1 open reading frame 21                                                            | -1.501 | 2.9821 |
| 3820_at   | <i>KLRB1</i>     | killer cell lectin-like receptor subfamily B, member 1                                        | -1.501 | 3.4989 |
| 10578_at  | <i>GNLY</i>      | granulysin                                                                                    | -1.502 | 4.4952 |
| 259292_at | <i>TAS2R46</i>   | taste receptor, type 2, member 46                                                             | -1.502 | 2.9821 |
| 917_at    | <i>CD3G</i>      | CD3g molecule, gamma (CD3-TCR complex)                                                        | -1.504 | 2.9821 |
| 5243_at   | <i>ABCB1</i>     | ATP-binding cassette, sub-family B (MDR/TAP), member 1                                        | -1.507 | 2.5934 |
| 9832_at   | <i>JAKMIP2</i>   | janus kinase and microtubule interacting protein 2                                            | -1.509 | 2.9821 |
| 256957_at | <i>C17orf66</i>  | chromosome 17 open reading frame 66                                                           | -1.510 | 2.9821 |
| 83988_at  | <i>NCALD</i>     | neurocalcin delta                                                                             | -1.510 | 2.9821 |
| 81794_at  | <i>ADAMTS10</i>  | ADAM metallopeptidase with thrombospondin type 1 motif, 10                                    | -1.520 | 2.5934 |
| 54843_at  | <i>SYTL2</i>     | synaptotagmin-like 2                                                                          | -1.520 | 4.0068 |
| 83888_at  | <i>FGFBP2</i>    | fibroblast growth factor binding protein 2                                                    | -1.521 | 3.4989 |
| 116987_at | <i>AGAP1</i>     | ArfGAP with GTPase domain, ankyrin repeat and PH domain 1                                     | -1.528 | 2.9821 |
| 59352_at  | <i>LGR6</i>      | leucine-rich repeat-containing G protein-coupled receptor 6                                   | -1.531 | 2.9821 |
| 4646_at   | <i>MYO6</i>      | myosin VI                                                                                     | -1.534 | 2.9821 |

|           |                 |                                                                        |        |        |
|-----------|-----------------|------------------------------------------------------------------------|--------|--------|
| 3127_at   | <i>HLA-DRB5</i> | major histocompatibility complex, class II, DR beta 5                  | -1.540 | 3.4989 |
| 8115_at   | <i>TCL1A</i>    | T-cell leukemia/lymphoma 1A                                            | -1.542 | 8.3194 |
| 22914_at  | <i>KLRK1</i>    | killer cell lectin-like receptor subfamily K, member 1                 | -1.544 | 2.5934 |
| 5727_at   | <i>PTCH1</i>    | patched homolog 1 (Drosophila)                                         | -1.554 | 2.5934 |
| 5729_at   | <i>PTGDR</i>    | prostaglandin D2 receptor (DP)                                         | -1.557 | 3.4989 |
| 4603_at   | <i>MYBL1</i>    | v-myb myeloblastosis viral oncogene homolog (avian)-like 1             | -1.561 | 2.9821 |
| 343413_at | <i>FCRL6</i>    | Fc receptor-like 6                                                     | -1.567 | 3.3639 |
| 154075_at | <i>SAMD3</i>    | sterile alpha motif domain containing 3                                | -1.576 | 2.9821 |
| 55450_at  | <i>CAMK2N1</i>  | calcium/calmodulin-dependent protein kinase II inhibitor 1             | -1.577 | 2.5934 |
| 59084_at  | <i>ENPP5</i>    | ectonucleotide pyrophosphatase/phosphodiesterase 5 (putative function) | -1.582 | 2.9821 |
| 3824_at   | <i>KLRD1</i>    | killer cell lectin-like receptor subfamily D, member 1                 | -1.593 | 2.5934 |
| 401124_at | <i>DTHD1</i>    | death domain containing 1                                              | -1.594 | 4.9964 |
| 2999_at   | <i>GZMH</i>     | granzyme H (cathepsin G-like 2, protein h-CCPX)                        | -1.602 | 3.3639 |
| 9289_at   | <i>GPR56</i>    | G protein-coupled receptor 56                                          | -1.605 | 2.9821 |
| 9254_at   | <i>CACNA2D2</i> | calcium channel, voltage-dependent, alpha 2/delta subunit 2            | -1.612 | 3.3639 |
| 7049_at   | <i>TGFBR3</i>   | transforming growth factor, beta receptor III                          | -1.618 | 2.9821 |
| 8302_at   | <i>KLRC4</i>    | killer cell lectin-like receptor subfamily C, member 4                 | -1.628 | 2.9821 |
| 22807_at  | <i>IKZF2</i>    | IKAROS family zinc finger 2 (Helios)                                   | -1.672 | 2.5934 |
| 51348_at  | <i>KLRF1</i>    | killer cell lectin-like receptor subfamily F, member 1                 | -1.674 | 2.5934 |
| 3823_at   | <i>KLRC3</i>    | killer cell lectin-like receptor subfamily C, member 3                 | -1.688 | 2.9821 |
| 5816_at   | <i>PVALB</i>    | parvalbumin                                                            | -1.725 | 5.4721 |
| 11126_at  | <i>CD160</i>    | CD160 molecule                                                         | -1.813 | 2.5934 |
| 400360_at | <i>C15orf54</i> | chromosome 15 open reading frame 54                                    | -1.871 | 2.9821 |
| 28559_at  | <i>TRBV28</i>   | T cell receptor beta variable 28                                       | -2.021 | 3.3639 |

---

|         |                 |                                                          |        |        |
|---------|-----------------|----------------------------------------------------------|--------|--------|
| 3123_at | <i>HLA-DRB1</i> | major histocompatibility complex, class II,<br>DR beta 1 | -2.205 | 3.3639 |
|---------|-----------------|----------------------------------------------------------|--------|--------|

---

**Supplementary Table S2:** Up- and downregulated pathways associated with low overall survival, sorted by number of genes involved.

| P-value             | N genes involved | N genes at pathway | REACT_ID    | Name of the event                                                 |
|---------------------|------------------|--------------------|-------------|-------------------------------------------------------------------|
| <b>UP-REGULATED</b> |                  |                    |             |                                                                   |
| <b>Metabolism</b>   |                  |                    |             |                                                                   |
| 0.015392694         | 19               | 200                | REACT_13    | Metabolism of amino acids and derivatives                         |
| 6.30E-005           | 18               | 116                | REACT_474   | Metabolism of carbohydrates                                       |
| 0.000284586         | 13               | 77                 | REACT_1698  | Metabolism of nucleotides                                         |
| 7.37E-006           | 11               | 40                 | REACT_1046  | Pyruvate metabolism and Citric Acid (TCA) cycle                   |
| 0.000353746         | 10               | 50                 | REACT_13565 | Regulation of ornithine decarboxylase (ODC)                       |
| 0.001542951         | 9                | 50                 | REACT_1221  | CDK-mediated phosphorylation and removal of Cdc6                  |
| 0.003932045         | 9                | 57                 | REACT_723   | Glucose metabolism                                                |
| 0.000302809         | 6                | 18                 | REACT_21330 | Synthesis and interconversion of nucleotide di- and triphosphates |
| 0.000422025         | 6                | 19                 | REACT_1785  | Citric acid cycle (TCA cycle)                                     |
| 0.007633839         | 6                | 32                 | REACT_522   | Purine metabolism                                                 |
| 0.000693541         | 5                | 14                 | REACT_1008  | Glycogen breakdown (glycogenolysis)                               |
| 0.002467109         | 5                | 18                 | REACT_2071  | Pyruvate metabolism                                               |
| 0.007701138         | 5                | 23                 | REACT_2002  | Endosome acidification                                            |
| 0.007701138         | 5                | 23                 | REACT_25268 | Acidification of Tf:TfR1 containing endosome                      |
| 0.000292334         | 4                | 7                  | REACT_1859  | Pentose phosphate pathway (hexose monophosphate shunt)            |
| 0.00055902          | 4                | 8                  | REACT_1736  | Glycogen synthesis                                                |
| 0.006118549         | 4                | 14                 | REACT_9431  | Metabolism of porphyrins                                          |
| 0.022740197         | 4                | 20                 | REACT_16957 | Peroxisomal lipid metabolism                                      |
| 0.000662594         | 3                | 4                  | REACT_1827  | alpha-D-Glucose + ATP => alpha-D-glucose 6-phosphate + ADP        |

|             |   |    |             |                                                                                                                   |
|-------------|---|----|-------------|-------------------------------------------------------------------------------------------------------------------|
| 0.000662594 | 3 | 4  | REACT_1407  | Plasmalogen biosynthesis                                                                                          |
| 0.011277931 | 3 | 9  | REACT_9465  | Heme biosynthesis                                                                                                 |
| 0.015454102 | 3 | 10 | REACT_2086  | Purine catabolism                                                                                                 |
| 0.015454102 | 3 | 10 | REACT_22099 | Phosphorylation of L1 by ERK                                                                                      |
| 0.026077985 | 3 | 12 | REACT_1923  | Purine salvage                                                                                                    |
| 0.047672127 | 3 | 15 | REACT_6759  | Formation of ATP by chemiosmotic coupling                                                                         |
| 0.047672127 | 3 | 15 | REACT_190   | ATP is synthesized from ADP and Pi by ATPase                                                                      |
| 0.047672127 | 3 | 15 | REACT_1985  | Enzyme-bound ATP is released                                                                                      |
| 0.047672127 | 3 | 15 | REACT_991   | ADP and Pi bind to ATPase                                                                                         |
| 0.003113249 | 2 | 2  | REACT_2164  | alpha-D-Glucose 6-phosphate <=> D-Glucose 1-phosphate                                                             |
| 0.003113249 | 2 | 2  | REACT_605   | D-Glucose 1-phosphate <=> alpha-D-Glucose 6-phosphate                                                             |
| 0.003113249 | 2 | 2  | REACT_939   | Insulin effects increased synthesis of Xylulose-5-Phosphate                                                       |
| 0.003113249 | 2 | 2  | REACT_9463  | Succinyl CoA and glycine condense to form 5-aminolevulinate (ALA)                                                 |
| 0.008994111 | 2 | 3  | REACT_1865  | alpha-ketoadipate + CoASH + NAD+ => glutaryl-CoA + CO2 + NADH + H+                                                |
| 0.008994111 | 2 | 3  | REACT_66    | alpha-ketoglutarate + CoASH + NAD+ => succinyl-CoA + CO2 + NADH + H+                                              |
| 0.008994111 | 2 | 3  | REACT_375   | NDP + reduced glutaredoxin => dNDP + oxidized glutaredoxin + H2O                                                  |
| 0.008994111 | 2 | 3  | REACT_2182  | NDP + reduced thioredoxin => dNDP + oxidized thioredoxin + H2O                                                    |
| 0.008994111 | 2 | 3  | REACT_642   | NDP + reduced thioredoxin => dNDP + oxidized thioredoxin + H2O                                                    |
| 0.017325627 | 2 | 4  | REACT_1053  | 8 UDP-glucose + ((1,4)-alpha-D-glucosyl)4 glycogenin => 8 UDP + ((1,4)-alpha-D-glucosyl)8 glycogenin [GYS D form] |
| 0.017325627 | 2 | 4  | REACT_1169  | 8 UDP-glucose + ((1,4)-alpha-D-glucosyl)4 glycogenin => 8 UDP + ((1,4)-alpha-D-glucosyl)8 glycogenin [GYS I form] |
| 0.017325627 | 2 | 4  | REACT_16882 | Basigin binds MCT1, MCT3 and MCT4                                                                                 |
| 0.017325627 | 2 | 4  | REACT_14855 | lactate + H+ [extracellular] <=> lactate + H+ [cytosol]                                                           |
| 0.017325627 | 2 | 4  | REACT_14839 | lactate + H+ [cytosol] <=> lactate + H+ [extracellular]                                                           |

|                            |    |     |             |                                                                                                |
|----------------------------|----|-----|-------------|------------------------------------------------------------------------------------------------|
| 0.027817417                | 2  | 5   | REACT_983   | pyruvate + CoASH + NAD+ => acetylCoA + CO2 + NADH + H+                                         |
| 0.027817417                | 2  | 5   | REACT_1623  | glycogen phosphorylase (PYGL) dimer b + 2 ATP => glycogen phosphorylase (PYGL) dimer a + 2 ADP |
| 0.027817417                | 2  | 5   | REACT_13578 | Antizyme inhibitor binds to OAZ and stabilizes ODC complex                                     |
| <b>Apoptosis</b>           |    |     |             |                                                                                                |
| 0.001471786                | 17 | 137 | REACT_578   | Apoptosis                                                                                      |
| 0.00443228                 | 9  | 58  | REACT_13648 | Regulation of Apoptosis                                                                        |
| 0.007839346                | 3  | 8   | REACT_1213  | Apoptosis induced DNA fragmentation                                                            |
| <b>DNA damage/repair</b>   |    |     |             |                                                                                                |
| 0.002053978                | 9  | 52  | REACT_2160  | p53-Independent DNA Damage Response                                                            |
| 0.002053978                | 9  | 52  | REACT_1208  | p53-Independent G1/S DNA damage checkpoint                                                     |
| 0.003064646                | 9  | 55  | REACT_1625  | p53-Dependent G1 DNA Damage Response                                                           |
| 0.003064646                | 9  | 55  | REACT_85    | p53-Dependent G1/S DNA damage checkpoint                                                       |
| 0.00443228                 | 9  | 58  | REACT_2254  | G1/S DNA Damage Checkpoints                                                                    |
| 0.007839346                | 3  | 8   | REACT_13462 | Activation of DNA fragmentation factor                                                         |
| 0.047672127                | 3  | 15  | REACT_378   | Repair synthesis of patch ~27-30 bases long by DNA polymerase                                  |
| 0.047672127                | 3  | 15  | REACT_1993  | Repair synthesis for gap-filling by DNA polymerase in TC-NER                                   |
| <b>Protein degradation</b> |    |     |             |                                                                                                |
| 0.002435364                | 11 | 74  | REACT_9453  | Vif-mediated degradation of APOBEC3G                                                           |
| 0.002435364                | 11 | 74  | REACT_9466  | Proteasome-mediated degradation of APOBEC3G                                                    |
| 0.001581725                | 10 | 60  | REACT_6715  | Degradation of multiubiquitinated Cdh1                                                         |
| 0.001581725                | 10 | 60  | REACT_6785  | Autodegradation of Cdh1 by Cdh1:APC/C                                                          |
| 0.002608064                | 10 | 64  | REACT_6871  | APC/C:Cdc20 mediated degradation of Securin                                                    |
| 0.002608064                | 10 | 64  | REACT_6777  | Degradation of multiubiquitinated Securin                                                      |
| 0.002608064                | 10 | 64  | REACT_9035  | APC/C:Cdh1-mediated degradation of Skp2                                                        |



|             |    |    |             |                                                                                                          |
|-------------|----|----|-------------|----------------------------------------------------------------------------------------------------------|
| 0.0036828   | 10 | 67 | REACT_6850  | Cdc20:Phospho-APC/C mediated degradation of Cyclin A                                                     |
| 0.0036828   | 10 | 67 | REACT_6937  | Degradation multiubiquitinated Cyclin A                                                                  |
| 0.004110225 | 10 | 68 | REACT_6826  | Degradation of multiubiquitinated cell cycle proteins                                                    |
| 0.004575942 | 10 | 69 | REACT_6761  | APC/C:Cdh1 mediated degradation of Cdc20 and other APC/C:Cdh1 targeted proteins in late mitosis/early G1 |
| 0.004575942 | 10 | 69 | REACT_6781  | APC/C:Cdc20 mediated degradation of mitotic proteins                                                     |
| 0.005082255 | 10 | 70 | REACT_6954  | Activation of APC/C and APC/C:Cdc20 mediated degradation of mitotic proteins                             |
| 0.011867326 | 10 | 79 | REACT_6828  | APC/C-mediated degradation of cell cycle proteins                                                        |
| 0.001139438 | 9  | 48 | REACT_13491 | 26S proteasome degrades ODC holoenzyme complex                                                           |
| 0.001139438 | 9  | 48 | REACT_75871 | Proteasomal cleavage of substrate                                                                        |
| 0.001328894 | 9  | 49 | REACT_1471  | Ubiquitinated geminin is degraded by the proteasome                                                      |
| 0.001328894 | 9  | 49 | REACT_480   | Ubiquitinated Orc1 is degraded by the proteasome                                                         |
| 0.001328894 | 9  | 49 | REACT_1210  | Ubiquitinated Cdc6 is degraded by the proteasome                                                         |
| 0.001328894 | 9  | 49 | REACT_873   | Proteolytic degradation of ubiquitinated-Cdc25A                                                          |
| 0.001328894 | 9  | 49 | REACT_2142  | Proteasome mediated degradation of Cyclin D1                                                             |
| 0.001328894 | 9  | 49 | REACT_13413 | Proteasome mediated degradation of PAK-2p34                                                              |
| 0.001328894 | 9  | 49 | REACT_13464 | Regulation of activated PAK-2p34 by proteasome mediated degradation                                      |
| 0.001328894 | 9  | 49 | REACT_13505 | Proteasome mediated degradation of PAK-2p34                                                              |
| 0.001328894 | 9  | 49 | REACT_20637 | Proteasome mediated degradation of COP1                                                                  |
| 0.001542951 | 9  | 50 | REACT_4     | Ubiquitin-dependent degradation of Cyclin D1                                                             |
| 0.001542951 | 9  | 50 | REACT_938   | Ubiquitin-dependent degradation of Cyclin D                                                              |
| 0.00178386  | 9  | 51 | REACT_20549 | Autodegradation of the E3 ubiquitin ligase COP1                                                          |
| 0.002053978 | 9  | 52 | REACT_1614  | Ubiquitin Mediated Degradation of Phosphorylated Cdc25A                                                  |
| 0.002053978 | 9  | 52 | REACT_9034  | Degradation of ubiquitinated p27/p21 by the 26S proteasome                                               |

|             |   |    |             |                                                              |
|-------------|---|----|-------------|--------------------------------------------------------------|
| 0.002053978 | 9 | 52 | REACT_9003  | SCF(Skp2)-mediated degradation of p27/p21                    |
| 0.002355762 | 9 | 53 | REACT_75842 | Antigen processing: Ubiquitination & Proteasome degradation  |
| 0.002691768 | 9 | 54 | REACT_6821  | SCF-beta-TrCP mediated degradation of Emi1                   |
| 0.002691768 | 9 | 54 | REACT_6878  | SCF-mediated degradation of Emi1                             |
| 0.003477132 | 9 | 56 | REACT_11063 | Degradation of beta-catenin by the destruction complex       |
| 0.003477132 | 9 | 56 | REACT_10017 | Degradation of ubiquitinated -beta catenin by the proteasome |
| 0.024742631 | 9 | 76 | REACT_9031  | Vpu mediated degradation of CD4                              |
| 0.024742631 | 9 | 76 | REACT_9018  | Degradation of ubiquitinated CD4                             |
| 0.015454102 | 3 | 10 | REACT_25315 | Ubiquitination of AUF1 (hnRNP D0)                            |

#### Signal transduction

|             |    |     |             |                                                                                             |
|-------------|----|-----|-------------|---------------------------------------------------------------------------------------------|
| 0.048274995 | 18 | 212 | REACT_11061 | Signalling by NGF                                                                           |
| 0.047835111 | 12 | 126 | REACT_12056 | NGF signalling via TRKA from the plasma membrane                                            |
| 0.003477132 | 9  | 56  | REACT_11045 | Signaling by Wnt                                                                            |
| 0.034044476 | 6  | 44  | REACT_75913 | Nucleotide-binding domain, leucine rich repeat containing receptor (NLR) signaling pathways |
| 0.015395034 | 5  | 27  | REACT_12484 | EGFR downregulation                                                                         |
| 0.026889844 | 4  | 21  | REACT_21399 | activated TAK1 mediates p38 MAPK activation                                                 |
| 0.003044842 | 3  | 6   | REACT_21395 | activated human MKK3/MKK6 phosphorylates p38 MAPK complexed with MAPKAPK2 or MAPKAPK3       |
| 0.020385123 | 3  | 11  | REACT_12435 | Retrograde neurotrophin signalling                                                          |
| 0.032530817 | 3  | 13  | REACT_12065 | p38MAPK events                                                                              |
| 0.047672127 | 3  | 15  | REACT_22240 | Phosphorylation of L1 by p90rsk                                                             |
| 0.017325627 | 2  | 4   | REACT_12032 | MAP kinase activates MAPKAPK2, MAPKAPK3 and MSK1                                            |
| 0.017325627 | 2  | 4   | REACT_21375 | Active p38 MAPK phosphorylates MAPKAPK2 or 3                                                |
| 0.017325627 | 2  | 4   | REACT_21358 | Nuclear export of human p38 MAPK mediated by its substrate MAPKAPK2 or 3                    |

#### Cell Transport

|                    |    |     |             |                                                                                                                     |
|--------------------|----|-----|-------------|---------------------------------------------------------------------------------------------------------------------|
| 0.000681435        | 13 | 84  | REACT_11123 | Membrane Trafficking                                                                                                |
| 0.001985072        | 13 | 94  | REACT_6305  | Respiratory electron transport, ATP synthesis by chemiosmotic coupling, and heat production by uncoupling proteins. |
| 0.009107485        | 10 | 76  | REACT_22393 | Respiratory electron transport                                                                                      |
| 0.000100291        | 8  | 28  | REACT_27258 | Endosomal Sorting Complex Required For Transport (ESCRT)                                                            |
| 0.000532609        | 7  | 27  | REACT_25283 | Transferrin endocytosis and recycling                                                                               |
| 0.003819463        | 7  | 37  | REACT_25060 | Iron uptake and transport                                                                                           |
| 0.000993223        | 5  | 15  | REACT_27290 | MVB Vesicle Formation                                                                                               |
| 0.001379383        | 5  | 16  | REACT_27184 | ESCRT Disassembly                                                                                                   |
| 0.011097932        | 5  | 25  | REACT_1109  | Insulin receptor recycling                                                                                          |
| 0.019006494        | 4  | 19  | REACT_12495 | Assembly in clathrin-coated vesicles (CCVs)                                                                         |
| 0.007839346        | 3  | 8   | REACT_22118 | L1 binds to AP-2 Clathrin complex                                                                                   |
| 0.011277931        | 3  | 9   | REACT_12559 | Formation of clathrin-coated vesicle                                                                                |
| 0.011277931        | 3  | 9   | REACT_22103 | Transport of L1 into endosomes                                                                                      |
| 0.011277931        | 3  | 9   | REACT_22359 | Formation of clathrin coated vesicle                                                                                |
| 0.015454102        | 3  | 10  | REACT_12397 | Endocytosis (internalization) of clathrin-coated vesicle                                                            |
| 0.020385123        | 3  | 11  | REACT_12385 | Axonal transport of NGF:Trk complexes                                                                               |
| 0.020385123        | 3  | 11  | REACT_22136 | Transport of L1 from C-domain to P-domain                                                                           |
| <b>Cell growth</b> |    |     |             |                                                                                                                     |
| 0.00063613         | 14 | 94  | REACT_2014  | Synthesis of DNA                                                                                                    |
| 0.001923966        | 14 | 105 | REACT_899   | S Phase                                                                                                             |
| 0.003469373        | 13 | 100 | REACT_1783  | G1/S Transition                                                                                                     |
| 0.007275887        | 13 | 109 | REACT_21267 | Mitotic G1-G1/S phases                                                                                              |
| 0.011273817        | 13 | 115 | REACT_1538  | Cell Cycle Checkpoints                                                                                              |

|                              |    |    |             |                                                                     |
|------------------------------|----|----|-------------|---------------------------------------------------------------------|
| 0.001290635                  | 12 | 79 | REACT_1725  | M/G1 Transition                                                     |
| 0.001290635                  | 12 | 79 | REACT_734   | DNA Replication Pre-Initiation                                      |
| 0.000712619                  | 11 | 64 | REACT_2243  | Assembly of the pre-replicative complex                             |
| 0.001203735                  | 11 | 68 | REACT_1156  | Orc1 removal from chromatin                                         |
| 0.001203735                  | 11 | 68 | REACT_2148  | Switching of origins to a post-replicative state                    |
| 0.001538063                  | 11 | 70 | REACT_207   | Removal of licensing factors from origins                           |
| 0.001538063                  | 11 | 70 | REACT_829   | Regulation of DNA replication                                       |
| 0.008306703                  | 10 | 75 | REACT_6837  | Regulation of APC/C activators between G1/S and early anaphase      |
| 0.011867326                  | 10 | 79 | REACT_21279 | Regulation of mitotic cell cycle                                    |
| 0.00443228                   | 9  | 58 | REACT_1949  | CDT1 association with the CDC6:ORC:origin complex                   |
| 0.004980802                  | 9  | 59 | REACT_9029  | Cyclin A:Cdk2-associated events at S phase entry                    |
| 0.006234874                  | 9  | 61 | REACT_1574  | Cyclin E associated events during G1/S transition                   |
| 0.034499345                  | 5  | 33 | REACT_7970  | Telomere Maintenance                                                |
| 0.003113249                  | 2  | 2  | REACT_936   | Formation of Elongin BC complex                                     |
| 0.040203704                  | 2  | 6  | REACT_1303  | Mcm4,6,7 trimer forms and associates with the replication fork      |
| 0.040203704                  | 2  | 6  | REACT_6922  | MCM2-7 mediated fork unwinding                                      |
| <b>Proteins organization</b> |    |    |             |                                                                     |
| 0.000857077                  | 13 | 86 | REACT_24994 | Regulation of mRNA Stability by Proteins that Bind AU-rich Elements |
| 0.000151167                  | 11 | 54 | REACT_25325 | Destabilization of mRNA by AUF1 (hnRNP D0)                          |
| 0.002053978                  | 9  | 52 | REACT_309   | Stabilization of p53                                                |
| 0.00303599                   | 8  | 45 | REACT_25343 | Destruction of AUF1 and mRNA                                        |
| 0.017909354                  | 5  | 28 | REACT_75925 | Amyloids                                                            |
| 0.004568547                  | 4  | 13 | REACT_27319 | Cargo Sequestration                                                 |

|             |   |    |             |                                                                  |
|-------------|---|----|-------------|------------------------------------------------------------------|
| 0.000172819 | 3 | 3  | REACT_12073 | Heterdimerization of CEACAMs                                     |
| 0.020385123 | 3 | 11 | REACT_22298 | Reinsertion of L1 into the plasma membrane                       |
| 0.032530817 | 3 | 13 | REACT_27272 | Cargo Recognition And Sorting                                    |
| 0.008994111 | 2 | 3  | REACT_51    | Formation of elongin complex                                     |
| 0.008994111 | 2 | 3  | REACT_24015 | Recruitment of PYK2 to pSIRP alpha                               |
| 0.008994111 | 2 | 3  | REACT_21266 | Surface deployment of platelet dense granule membrane components |
| 0.027817417 | 2 | 5  | REACT_75858 | Serum amyloid P binds DNA and chromatin                          |
| 0.040203704 | 2 | 6  | REACT_25267 | Association of AUF1 with Translation and Heat Shock Proteins     |

#### Inflammation

|             |   |    |             |                        |
|-------------|---|----|-------------|------------------------|
| 0.003197496 | 5 | 19 | REACT_75900 | Inflammasomes          |
| 0.032530817 | 3 | 13 | REACT_75808 | The NLRP3 inflammasome |

#### DOWN-REGULATED

#### Metabolism

|             |    |     |             |                                                                                  |
|-------------|----|-----|-------------|----------------------------------------------------------------------------------|
| 0.01065623  | 14 | 134 | REACT_15550 | Insulin Synthesis and Processing                                                 |
| 0.005841435 | 14 | 125 | REACT_11051 | Rho GTPase cycle                                                                 |
| 0.004950053 | 13 | 110 | REACT_2085  | GTP hydrolysis and joining of the 60S ribosomal subunit                          |
| 0.00229006  | 12 | 89  | REACT_1654  | GTP Hydrolysis by eRF3 bound to the eRF1:mRNA:polypeptide:80S Ribosome complex   |
| 0.002076775 | 12 | 88  | REACT_3     | eIF5B:GTP is hydrolyzed and released                                             |
| 0.002076775 | 12 | 88  | REACT_552   | Hydrolysis of eEF1A:GTP                                                          |
| 0.002076775 | 12 | 88  | REACT_13617 | MAFA-, NKX2-2-, PAX6-, and PDX1-dependent synthesis of insulin precursor protein |
| 0.00667226  | 7  | 43  | REACT_15426 | PLC beta mediated events                                                         |
| 0.021759309 | 6  | 42  | REACT_12640 | Inactivation of Lck by Csk                                                       |
| 0.017379403 | 6  | 40  | REACT_12467 | Activation of Lck                                                                |
| 0.045583362 | 4  | 26  | REACT_9000  | Calmodulin induced events                                                        |

|                      |    |     |             |                                                                             |
|----------------------|----|-----|-------------|-----------------------------------------------------------------------------|
| 0.045583362          | 4  | 26  | REACT_9053  | CaM pathway                                                                 |
| 0.040180791          | 4  | 25  | REACT_24941 | Circadian Clock                                                             |
| 0.030532081          | 4  | 23  | REACT_18274 | Regulation of Insulin Secretion by Glucagon-like Peptide-1                  |
| 0.030532081          | 4  | 23  | REACT_24023 | Regulation of Water Balance by Renal Aquaporins                             |
| 0.049064325          | 3  | 16  | REACT_18342 | Nucleotide-like (purinergic) receptors                                      |
| 0.025036396          | 2  | 5   | REACT_16916 | PLC-gamma hydrolyses PIP2                                                   |
| 0.015561521          | 2  | 4   | REACT_23956 | PMCA extrusion of Ca <sup>2+</sup>                                          |
| 0.015561521          | 2  | 4   | REACT_75931 | Trimming of N-ter extended precursor fragments by cytosolic aminopeptidases |
| <b>Apoptosis</b>     |    |     |             |                                                                             |
| 0.012304399          | 5  | 27  | REACT_964   | Intrinsic Pathway for Apoptosis                                             |
| 0.015561521          | 2  | 4   | REACT_12563 | Interaction and oligomerization of MALT1 to Bcl10                           |
| 0.015561521          | 2  | 4   | REACT_13427 | NRAGE activates JNK                                                         |
| 0.008061587          | 2  | 3   | REACT_75844 | Bcl-2 and Bcl-XL bind NLRP1                                                 |
| <b>Immune system</b> |    |     |             |                                                                             |
| 0.015561521          | 2  | 4   | REACT_6786  | Ubiquitin-dependent degradation controls basal levels of R-SMAD             |
| 0.000186556          | 60 | 729 | REACT_6900  | Immune System                                                               |
| 3.23E-005            | 44 | 450 | REACT_75774 | Adaptive Immunity Signaling                                                 |
| 0.02307924           | 22 | 266 | REACT_11152 | Immunoregulatory interactions between a Lymphoid and a non-Lymphoid cell    |
| 0.004224502          | 13 | 108 | REACT_13698 | Regulation of beta-cell development                                         |
| 0.025267619          | 12 | 121 | REACT_6167  | Influenza Infection                                                         |
| 0.018738514          | 12 | 116 | REACT_6145  | Influenza Life Cycle                                                        |
| 0.014500061          | 12 | 112 | REACT_6152  | Influenza Viral RNA Transcription and Replication                           |
| 0.008885861          | 12 | 105 | REACT_9491  | Viral mRNA Translation                                                      |
| 0.008247427          | 12 | 104 | REACT_9514  | Viral Protein Synthesis                                                     |

|             |    |    |             |                                                                         |
|-------------|----|----|-------------|-------------------------------------------------------------------------|
| 0.002076775 | 12 | 88 | REACT_9524  | Synthesis of PB1-F2                                                     |
| 0.000624275 | 12 | 77 | REACT_19344 | Costimulation by the CD28 family                                        |
| 0.020191091 | 8  | 65 | REACT_6835  | The role of Nef in HIV-1 replication and disease pathogenesis           |
| 0.011636903 | 8  | 59 | REACT_11080 | TCR complex interacts with peptide antigen-presenting MHC Class I       |
| 0.005093469 | 7  | 41 | REACT_12596 | Translocation of ZAP-70 to Immunological synapse                        |
| 0.00037935  | 7  | 27 | REACT_19183 | CD28 co-stimulation                                                     |
| 0.042758584 | 6  | 49 | REACT_23853 | Interactions of the immunoglobulin superfamily (IgSF) member proteins   |
| 0.017561519 | 3  | 11 | REACT_19238 | CD28 dependent Vav1 pathway                                             |
| 0.002593132 | 3  | 6  | REACT_27145 | Interleukin-2: IL2 receptor alpha:beta binds IL2 receptor gamma subunit |
| 0.025036396 | 2  | 5  | REACT_11121 | C3d-complexed antigen binds to complement receptor                      |
| 0.015561521 | 2  | 4  | REACT_11119 | NKG2A-CD94 heterdimer interacts with HLA-E                              |
| 0.015561521 | 2  | 4  | REACT_14847 | Receptors CCR3, 4 and 5 bind CCL5 ligand                                |
| 0.015561521 | 2  | 4  | REACT_27278 | Interleukin-2 receptor alpha:IL2 binds Interleukin-2 receptor beta      |
| 0.008061587 | 2  | 3  | REACT_11106 | MHC Class I interacts with CD160                                        |
| 0.008061587 | 2  | 3  | REACT_11140 | KIR2DL1 interacting with HLA-C group 2 (Cw3)                            |
| 0.008061587 | 2  | 3  | REACT_11124 | KIR3DL2 interacting with HLA-A3                                         |
| 0.002784626 | 2  | 2  | REACT_19295 | SEMA4D interacts with CD45                                              |

### Signal transduction

|             |    |     |             |                                                         |
|-------------|----|-----|-------------|---------------------------------------------------------|
| 0.001650096 | 22 | 212 | REACT_11061 | Signalling by NGF                                       |
| 1.22E-006   | 17 | 84  | REACT_12526 | TCR signaling                                           |
| 0.005841435 | 14 | 125 | REACT_11044 | Signaling by Rho GTPases                                |
| 0.015027192 | 13 | 126 | REACT_12056 | NGF signalling via TRKA from the plasma membrane        |
| 0.004950053 | 13 | 110 | REACT_75891 | Phosphorylated UPF1 Recruits SMG5, SMG7, SMG6, and PP2A |

|             |    |     |             |                                                              |
|-------------|----|-----|-------------|--------------------------------------------------------------|
| 0.003030769 | 13 | 104 | REACT_75910 | SMG1 Phosphorylates UPF1 (Enhanced by Exon Junction Complex) |
| 0.002780132 | 13 | 103 | REACT_15421 | Cleavage of the Signal Peptide of Preproinsulin              |
| 0.000975634 | 13 | 92  | REACT_12051 | Cell surface interactions at the vascular wall               |
| 0.005134165 | 12 | 98  | REACT_15358 | Interaction between SRP and SRP Receptor                     |
| 0.004336652 | 12 | 96  | REACT_15319 | Signal Recognition (Preproinsulin)                           |
| 0.004336652 | 12 | 96  | REACT_20565 | Signal Recognition (Preprolactin)                            |
| 0.000759184 | 11 | 68  | REACT_12555 | Downstream TCR signaling                                     |
| 7.65E-005   | 11 | 53  | REACT_12623 | Generation of second messenger molecules                     |
| 1.86E-005   | 11 | 46  | REACT_12498 | Phosphorylation of PLC-gamma1                                |
| 0.039060641 | 9  | 87  | REACT_13776 | p75 NTR receptor-mediated signalling                         |
| 0.00433298  | 9  | 61  | REACT_18407 | G alpha (12/13) signalling events                            |
| 0.003867925 | 9  | 60  | REACT_15295 | Opioid Signalling                                            |
| 0.000389117 | 9  | 44  | REACT_12615 | Phosphorylation of SLP-76                                    |
| 0.018523772 | 8  | 64  | REACT_13720 | Cell death signalling via NRAGE, NRIF and NADE               |
| 0.010525854 | 8  | 58  | REACT_10098 | GEFs activate Rho GTPase:GDP                                 |
| 0.002850499 | 8  | 47  | REACT_13638 | NRAGE signals death through JNK                              |
| 0.001345375 | 8  | 42  | REACT_12421 | Phosphorylation of TBSMs in LAT                              |
| 0.009685997 | 7  | 46  | REACT_23837 | Interleukin-3, 5 and GM-CSF signaling                        |
| 0.007585877 | 7  | 44  | REACT_15526 | G-protein mediated events                                    |
| 0.00667226  | 7  | 43  | REACT_12582 | Phosphorylation of CD3 and TCR zeta chains                   |
| 0.005843087 | 7  | 42  | REACT_19216 | GEFs activate RhoA,B,C                                       |
| 0.005093469 | 7  | 41  | REACT_12538 | Phosphorylation of ZAP-70 by Lck                             |
| 0.005093469 | 7  | 41  | REACT_12394 | Activation of ZAP-70                                         |



|             |   |    |             |                                                                                             |
|-------------|---|----|-------------|---------------------------------------------------------------------------------------------|
| 0.005093469 | 7 | 41 | REACT_12446 | Dephosphorylation of Lck-pY505 by CD45                                                      |
| 0.001672101 | 7 | 34 | REACT_12079 | PLC-gamma1 signalling                                                                       |
| 0.03262897  | 6 | 46 | REACT_19146 | Dephosphorylation of CD3-zeta by PD-1 bound phosphatases                                    |
| 0.03262897  | 6 | 46 | REACT_19324 | PD-1 signaling                                                                              |
| 0.026830065 | 6 | 44 | REACT_75913 | Nucleotide-binding domain, leucine rich repeat containing receptor (NLR) signaling pathways |
| 0.017379403 | 6 | 40 | REACT_12633 | Phosphorylation of ITAM motifs in CD3 complexes                                             |
| 0.017379403 | 6 | 40 | REACT_13694 | p75NTR indirectly activates RAC and Cdc42 via a guanyl-nucleotide exchange factor           |
| 0.001556972 | 6 | 25 | REACT_2202  | Effects of PIP2 hydrolysis                                                                  |
| 0.000155659 | 6 | 17 | REACT_19358 | CD28 dependent PI3K/Akt signaling                                                           |
| 0.043360304 | 5 | 37 | REACT_20563 | Activation of NMDA receptor upon glutamate binding and postsynaptic events                  |
| 0.039123685 | 5 | 36 | REACT_17025 | Down-stream signal transduction                                                             |
| 0.027980085 | 5 | 33 | REACT_1665  | Glucagon signaling in metabolic regulation                                                  |
| 0.027980085 | 5 | 33 | REACT_20593 | Post NMDA receptor activation events                                                        |
| 0.030532081 | 4 | 23 | REACT_12034 | Signaling by BMP                                                                            |
| 0.030532081 | 4 | 23 | REACT_23832 | Nephrin interactions                                                                        |
| 0.030532081 | 4 | 23 | REACT_24024 | Gab2 binds the p85 subunit of Class 1A PI3 kinases                                          |
| 0.006557378 | 4 | 15 | REACT_6844  | Signaling by TGF beta                                                                       |
| 0.000778848 | 4 | 9  | REACT_19212 | PI3K binds CD28                                                                             |
| 0.000778848 | 4 | 9  | REACT_19274 | CD28 bound PI3K phosphorylates PIP2 to PIP3                                                 |
| 0.000105283 | 4 | 6  | REACT_19159 | Gads binds CD28                                                                             |
| 0.049064325 | 3 | 16 | REACT_15530 | PKA activation                                                                              |
| 0.041437086 | 3 | 15 | REACT_19333 | G alpha (z) signalling events                                                               |
| 0.034461145 | 3 | 14 | REACT_697   | Activation of BH3-only proteins                                                             |

|             |   |    |             |                                                                            |
|-------------|---|----|-------------|----------------------------------------------------------------------------|
| 0.034461145 | 3 | 14 | REACT_22351 | DCC mediated attractive signaling                                          |
| 0.022516538 | 3 | 12 | REACT_12519 | PECAM1 interactions                                                        |
| 0.022516538 | 3 | 12 | REACT_18289 | P2Y receptors                                                              |
| 0.013283338 | 3 | 10 | REACT_12013 | I-Smad binds to type I receptor, preventing Smad1/5/8 from being activated |
| 0.006707393 | 3 | 8  | REACT_19264 | Phosphorylation of CD28                                                    |
| 0.006707393 | 3 | 8  | REACT_19243 | Activation of Rac1 by pVav1                                                |
| 0.006707393 | 3 | 8  | REACT_19286 | Activation of Cdc42 by pVav1                                               |
| 0.006707393 | 3 | 8  | REACT_25061 | Binding of CRY:PER Heterodimer to the BMAL1:CLOCK/NPAS2 Heterodimer        |
| 0.006707393 | 3 | 8  | REACT_27154 | Recruited STAT5 is phosphorylated                                          |
| 0.006707393 | 3 | 8  | REACT_27183 | Phosphorylation of IL2RB Y338, Y392 or Y510 enables STAT recruitment       |
| 0.006707393 | 3 | 8  | REACT_27314 | Phosphorylated STAT5 is released                                           |
| 0.004361389 | 3 | 7  | REACT_19316 | Activation of Vav1                                                         |
| 0.004361389 | 3 | 7  | REACT_27317 | Phosphorylation of IL2RB Y338 enables SHC recruitment                      |
| 0.004361389 | 3 | 7  | REACT_27150 | SHC1 bound to IL2 receptor is phosphorylated                               |
| 0.004361389 | 3 | 7  | REACT_27233 | SYK is a substrate for JAK1                                                |
| 0.004361389 | 3 | 7  | REACT_27313 | Syk binds IL2RB                                                            |
| 0.002593132 | 3 | 6  | REACT_19254 | Grb2 binds CD28                                                            |
| 0.002593132 | 3 | 6  | REACT_27274 | Within the IL-2R complex JAK3 phosphorylates JAK1                          |
| 0.002593132 | 3 | 6  | REACT_27196 | JAK1 phosphorylates Y338, Y392 and Y510 of IL2RB                           |
| 0.049016684 | 2 | 7  | REACT_637   | G12/13 activation by PAR                                                   |
| 0.049016684 | 2 | 7  | REACT_23839 | Thrombin-activated PAR binds G-protein G12/13                              |
| 0.049016684 | 2 | 7  | REACT_23796 | Dissociation of the PAR:G12/13 complex                                     |
| 0.036258028 | 2 | 6  | REACT_6744  | Phospho-R-SMAD dissociates from the receptor complex                       |

|             |   |   |             |                                                                         |
|-------------|---|---|-------------|-------------------------------------------------------------------------|
| 0.036258028 | 2 | 6 | REACT_6879  | Activated type I receptor phosphorylates R-SMAD directly                |
| 0.036258028 | 2 | 6 | REACT_12070 | Type II receptor phosphorylates type I receptor                         |
| 0.036258028 | 2 | 6 | REACT_12011 | BMP2 binds to the receptor complex                                      |
| 0.036258028 | 2 | 6 | REACT_12408 | Phosphorylation of PECAM-1 by Fyn or Lyn or c-Src                       |
| 0.036258028 | 2 | 6 | REACT_16997 | Nck binds to the active PDGF receptor                                   |
| 0.036258028 | 2 | 6 | REACT_20653 | ADP signalling through P2Y purinoceptor 12                              |
| 0.036258028 | 2 | 6 | REACT_20523 | Activated P2Y purinoceptor 12 binds G-protein Gi                        |
| 0.036258028 | 2 | 6 | REACT_20507 | Gi activation by P2Y purinoceptor 12                                    |
| 0.036258028 | 2 | 6 | REACT_23820 | Nephrin mediated activation of N-WASP                                   |
| 0.025036396 | 2 | 5 | REACT_16998 | PLC-gamma binds to the active receptor                                  |
| 0.025036396 | 2 | 5 | REACT_12561 | PI3K phosphorylates PIP2 to PIP3                                        |
| 0.025036396 | 2 | 5 | REACT_23958 | Activation of beta-arrestin-1-bound Src kinase                          |
| 0.025036396 | 2 | 5 | REACT_23900 | Activated Src activates ERK                                             |
| 0.025036396 | 2 | 5 | REACT_23781 | Beta-arrestin-1 acts as scaffold for a PAR1 signalling complex          |
| 0.025036396 | 2 | 5 | REACT_18416 | S1P-binding receptors bind S1P                                          |
| 0.015561521 | 2 | 4 | REACT_6887  | SKI complexes with the SMAD complex, suppressing TGF-beta signaling     |
| 0.015561521 | 2 | 4 | REACT_23917 | Activation of Protein Kinase C novel isoforms                           |
| 0.008061587 | 2 | 3 | REACT_1144  | Binding of IP3 to IP3 receptor                                          |
| 0.008061587 | 2 | 3 | REACT_12074 | Release of calcium from intracellular stores by IP3 receptor activation |
| 0.008061587 | 2 | 3 | REACT_12573 | Phosphorylation of CARMA1                                               |
| 0.008061587 | 2 | 3 | REACT_18395 | Opening of ER calcium channels by activated PKA                         |
| 0.008061587 | 2 | 3 | REACT_18335 | Phosphorylation of FANCI by ATM/ATR                                     |
| 0.008061587 | 2 | 3 | REACT_18293 | Phosphorylation of FANCD2 by ATR/ATM                                    |

|                        |    |     |             |                                                                                                        |
|------------------------|----|-----|-------------|--------------------------------------------------------------------------------------------------------|
| 0.008061587            | 2  | 3   | REACT_25029 | Phosphorylation and Nuclear Translocation of the BMAL1:CLOCK/NPAS2 Heterodimer                         |
| 0.008061587            | 2  | 3   | REACT_23803 | Syk/Lck phosphorylate LAT                                                                              |
| 0.008061587            | 2  | 3   | REACT_22135 | Inactive G alpha (z) reassociates with G beta:gamma                                                    |
| 0.002784626            | 2  | 2   | REACT_23835 | Activated PAR1 binds Beta-arrestin-1                                                                   |
| 0.002784626            | 2  | 2   | REACT_27175 | IL2RB associates with JAK1                                                                             |
| 0.008061587            | 2  | 3   | REACT_12008 | IP3 binds to the IP3 receptor, opening the endoplasmic reticulum Ca2+ channel                          |
| <b>Gene Expression</b> |    |     |             |                                                                                                        |
| 0.043587007            | 30 | 413 | REACT_71    | Gene Expression                                                                                        |
| 0.035911088            | 20 | 247 | REACT_21257 | Metabolism of RNA                                                                                      |
| 0.01276809             | 20 | 222 | REACT_20605 | Metabolism of mRNA                                                                                     |
| 0.005438258            | 14 | 124 | REACT_1014  | Translation                                                                                            |
| 0.003201673            | 14 | 117 | REACT_2159  | Eukaryotic Translation Initiation                                                                      |
| 0.003201673            | 14 | 117 | REACT_2099  | Cap-dependent Translation Initiation                                                                   |
| 0.004950053            | 13 | 110 | REACT_75886 | Nonsense-Mediated Decay                                                                                |
| 0.004950053            | 13 | 110 | REACT_75822 | Nonsense Mediated Decay Enhanced by the Exon Junction Complex                                          |
| 0.004575691            | 13 | 109 | REACT_79    | L13a-mediated translational silencing of Ceruloplasmin expression                                      |
| 0.004575691            | 13 | 109 | REACT_1762  | 3' -UTR-mediated translational regulation                                                              |
| 0.003895432            | 13 | 107 | REACT_75787 | SMG6 Cleaves mRNA with Premature Termination Codon                                                     |
| 0.003030769            | 13 | 104 | REACT_75753 | UPF1 Binds an mRNP with a Termination Codon Preceding an Exon Junction Complex                         |
| 0.001940961            | 13 | 99  | REACT_13819 | Regulation of gene expression in beta cells                                                            |
| 0.005134165            | 12 | 98  | REACT_1797  | Formation of a pool of free 40S subunits                                                               |
| 0.003329699            | 12 | 93  | REACT_75917 | Formation of UPF1:eRF3 Complex on mRNA with a Premature Termination Codon and No Exon Junction Complex |
| 0.003329699            | 12 | 93  | REACT_75768 | Nonsense Mediated Decay Independent of the Exon Junction Complex                                       |

|             |    |    |             |                                                                                                        |
|-------------|----|----|-------------|--------------------------------------------------------------------------------------------------------|
| 0.003039637 | 12 | 92 | REACT_1477  | Eukaryotic Translation Elongation                                                                      |
| 0.00229006  | 12 | 89 | REACT_1986  | Eukaryotic Translation Termination                                                                     |
| 0.00229006  | 12 | 89 | REACT_389   | Polypeptide release from the eRF3-GDP:eRF1:mRNA:80S Ribosome complex                                   |
| 0.00229006  | 12 | 89 | REACT_227   | GTP bound eRF3:eRF1 complex binds the peptidyl tRNA:mRNA:80S Ribosome complex                          |
| 0.00229006  | 12 | 89 | REACT_1404  | Peptide chain elongation                                                                               |
| 0.00229006  | 12 | 89 | REACT_1937  | Translocation of ribosome by 3 bases in the 3' direction                                               |
| 0.002076775 | 12 | 88 | REACT_198   | The 60S subunit joins the translation initiation complex                                               |
| 0.002076775 | 12 | 88 | REACT_2075  | Aminoacyl-tRNA binds to the ribosome at the A-site                                                     |
| 0.001880047 | 12 | 87 | REACT_928   | Release of 40S and 60S subunits from the 80S ribosome                                                  |
| 0.001880047 | 12 | 87 | REACT_1227  | Peptide transfer from P-site tRNA to the A-site tRNA                                                   |
| 0.018513126 | 7  | 52 | REACT_940   | Dissociation of L13a from the 60s ribosomal subunit                                                    |
| 0.03262897  | 6  | 46 | REACT_20639 | Deadenylation-dependent mRNA decay                                                                     |
| 0.004980284 | 5  | 22 | REACT_20514 | Deadenylation of mRNA                                                                                  |
| 0.035164041 | 4  | 24 | REACT_1309  | RNA Polymerase I Transcription                                                                         |
| 0.026282007 | 4  | 22 | REACT_1974  | RNA Polymerase I Promoter Clearance                                                                    |
| 0.022408966 | 4  | 21 | REACT_953   | RNA Polymerase I Transcription Initiation                                                              |
| 0.022408966 | 4  | 21 | REACT_1074  | RNA Polymerase I Transcription Termination                                                             |
| 0.022408966 | 4  | 21 | REACT_513   | Dissociation of PTRF:Polymerase I/Nascent Pre rRNA Complex:TTF-I:Sal Box                               |
| 0.022408966 | 4  | 21 | REACT_211   | PTRF Binds the Polymerase I Transcription Complex/Nascent Pre rRNA Complex paused at the TTF-I:Sal Box |
| 0.018906088 | 4  | 20 | REACT_139   | Recruitment of Active RNA Polymerase I to SL1:phos.UBF-1:rDNA Promoter                                 |
| 0.018906088 | 4  | 20 | REACT_373   | Loss of Rrn3 from RNA Polymerase I promoter escape complex                                             |
| 0.018906088 | 4  | 20 | REACT_1913  | RNA Polymerase I Promoter Escape                                                                       |
| 0.018906088 | 4  | 20 | REACT_2228  | Polymerase I Transcription Complex/Nascent Pre rRNA Complex pauses at the TTF-I:Sal Box                |

|                              |    |     |             |                                                                                    |
|------------------------------|----|-----|-------------|------------------------------------------------------------------------------------|
| 0.01576443                   | 4  | 19  | REACT_2204  | RNA Polymerase I Chain Elongation                                                  |
| 0.01576443                   | 4  | 19  | REACT_872   | Elongation of pre-rRNA transcript                                                  |
| 0.01576443                   | 4  | 19  | REACT_20651 | Deadenylation of mRNA by the CCR4-NOT Complex                                      |
| 0.049016684                  | 2  | 7   | REACT_1173  | Binding of Rrn3 to RNA Polymerase I                                                |
| 0.036258028                  | 2  | 6   | REACT_1773  | Assembly of RNA Polymerase I Holoenzyme (human)                                    |
| <b>Proteins organization</b> |    |     |             |                                                                                    |
| 0.004224502                  | 13 | 108 | REACT_15520 | Translocation of Preproinsulin to Endoplasmic Reticulum                            |
| 0.005093469                  | 7  | 41  | REACT_12566 | Change of PKC theta conformation                                                   |
| 0.005093469                  | 7  | 41  | REACT_12642 | Recruitment of ZAP-70 to phosphorylated ITAMs                                      |
| 0.022516538                  | 3  | 12  | REACT_22398 | Recruitment of ABLIM to the plasma membrane                                        |
| 0.004361389                  | 3  | 7   | REACT_19244 | Translocation of Vav1 to CD28                                                      |
| 0.001349207                  | 3  | 5   | REACT_25234 | Stabilization of Unphosphorylated<br>BMAL1:CLOCK/NPAS2 Heterodimer by CRY Proteins |
| 0.000561654                  | 3  | 4   | REACT_12506 | Recruitment of PLC-gamma1 to SLP-76                                                |
| 0.000561654                  | 3  | 4   | REACT_12604 | Recruitment of ITK to SLP-76                                                       |
| 0.000561654                  | 3  | 4   | REACT_12525 | Disassociation of PLC-gamma1 from SLP-76                                           |
| 0.049016684                  | 2  | 7   | REACT_549   | Activation of BAD and translocation to mitochondria                                |
| 0.049016684                  | 2  | 7   | REACT_1532  | cAMP induces dissociation of inactive PKA tetramers                                |
| 0.036258028                  | 2  | 6   | REACT_6923  | An anchoring protein, SARA, recruits R-SMAD                                        |
| 0.036258028                  | 2  | 6   | REACT_11173 | ICAMs 1-4 bind to Integrin LFA-1                                                   |
| 0.036258028                  | 2  | 6   | REACT_20630 | Dissociation of the P2Y purinoceptor 12:Gi complex                                 |
| 0.036258028                  | 2  | 6   | REACT_22150 | Liganded Gz-activating GPCRs bind inactive<br>heterotrimeric G-protein Gz          |
| 0.036258028                  | 2  | 6   | REACT_22380 | Liganded Gz-activating GPCR acts as a GEF for Gz                                   |
| 0.036258028                  | 2  | 6   | REACT_22170 | The Ligand:GPCR:Gz complex dissociates                                             |

|                     |    |     |             |                                                                     |
|---------------------|----|-----|-------------|---------------------------------------------------------------------|
| 0.025036396         | 2  | 5   | REACT_12486 | Recruitment of PI3K to plasmamembrane                               |
| 0.025036396         | 2  | 5   | REACT_12448 | Translocation of TRAF6 to CBM complex                               |
| 0.025036396         | 2  | 5   | REACT_12009 | Formation of a heteromeric BMP receptor complex                     |
| 0.025036396         | 2  | 5   | REACT_23852 | Nephrin binds NCK                                                   |
| 0.015561521         | 2  | 4   | REACT_701   | Activation, myristoylation of BID and translocation to mitochondria |
| 0.008061587         | 2  | 3   | REACT_11161 | VCAM-1interacts with VLA-4                                          |
| 0.008061587         | 2  | 3   | REACT_11199 | MADCAM interacts with Integrin alpha4beta7                          |
| 0.008061587         | 2  | 3   | REACT_12489 | Recruitment of SLP-76 to Gads                                       |
| 0.008061587         | 2  | 3   | REACT_12040 | VLA-4 binds JAM-B                                                   |
| 0.008061587         | 2  | 3   | REACT_13818 | Interaction of integrin alpha4beta1 with Fibronectin                |
| 0.008061587         | 2  | 3   | REACT_13516 | Interaction of integrin alpha4beta1 with Thrombospondin-1           |
| 0.008061587         | 2  | 3   | REACT_13810 | Interaction of integrin alpha4beta1 with Osteopontin                |
| 0.008061587         | 2  | 3   | REACT_25402 | Formation of BMAL1:CLOCK/NPAS2 Heterodimer                          |
| 0.002784626         | 2  | 2   | REACT_12398 | Recruitment of PLC-gamma1 to LAT                                    |
| 0.002784626         | 2  | 2   | REACT_12570 | Recruitment of Gads to LAT                                          |
| 0.002784626         | 2  | 2   | REACT_12618 | Disassociation of PLC-gamma1 from LAT                               |
| <b>Inflammation</b> |    |     |             |                                                                     |
| 0.01576443          | 4  | 19  | REACT_75900 | Inflammasomes                                                       |
| 0.008061587         | 2  | 3   | REACT_75927 | The NLRP1 inflammasome                                              |
| <b>Hemostasis</b>   |    |     |             |                                                                     |
| 0.000777173         | 38 | 426 | REACT_604   | Hemostasis                                                          |
| 0.002969268         | 23 | 236 | REACT_20    | Formation of Platelet plug                                          |
| 0.002360124         | 22 | 218 | REACT_798   | Platelet Activation                                                 |
| 0.020191091         | 8  | 65  | REACT_622   | Platelet activation triggers                                        |

|             |   |    |             |                                                                               |
|-------------|---|----|-------------|-------------------------------------------------------------------------------|
| 0.010525854 | 8 | 58 | REACT_23876 | Platelet homeostasis                                                          |
| 0.01576443  | 4 | 19 | REACT_23905 | Platelet calcium homeostasis                                                  |
| 0.008061587 | 2 | 3  | REACT_945   | Transport of Ca <sup>++</sup> from platelet dense tubular system to cytoplasm |

---



**Supplementary Table S3:** Overexpressed common elements between samples with  $\geq 5$  CTCs and samples from patients with shortest survival.

**Overexpressed common elements in samples with  $\geq 5$  CTCs and shortest survival**

|                 | Expression in $\geq 5$ CTCs vs $< 5$ CTCS |      | Overall survival |       |                  | Expression in $\geq 5$ CTCs vs $< 5$ CTCS |                 | Overall survival |       |
|-----------------|-------------------------------------------|------|------------------|-------|------------------|-------------------------------------------|-----------------|------------------|-------|
|                 | FC                                        | FDR  | HR               | FDR   |                  | FC                                        | FDR             | HR               | FDR   |
|                 | <i>ABCA13</i>                             | 3.12 | 1.06             | 1.64  |                  | 0.000                                     | <i>HIST1H3B</i> | 1.73             | 1.01  |
| <i>AHSP</i>     | 3.11                                      | 2.59 | 1.38             | 0.000 | <i>HLX</i>       | 1.52                                      | 0.39            | 5.69             | 0.000 |
| <i>ALAS2</i>    | 2.84                                      | 4.01 | 1.39             | 0.085 | <i>HP</i>        | 4.09                                      | 0.39            | 1.68             | 0.000 |
| <i>AMPD3</i>    | 1.60                                      | 0.39 | 5.58             | 0.000 | <i>LCN2</i>      | 2.28                                      | 1.01            | 2.05             | 0.000 |
| <i>ANXA3</i>    | 2.82                                      | 1.06 | 1.72             | 0.000 | <i>LIN7A</i>     | 1.73                                      | 0.39            | 4.63             | 0.000 |
| <i>ATP8B4</i>   | 1.79                                      | 0.39 | 3.96             | 0.000 | <i>LOC643332</i> | 1.96                                      | 0.39            | 3.39             | 0.000 |
| <i>BCL2L1</i>   | 1.52                                      | 5.47 | 1.88             | 0.149 | <i>LTF</i>       | 2.78                                      | 1.91            | 1.66             | 0.000 |
| <i>BLVRB</i>    | 1.71                                      | 1.01 | 2.30             | 0.000 | <i>MBOAT2</i>    | 1.69                                      | 1.06            | 2.95             | 0.000 |
| <i>BPGM</i>     | 1.83                                      | 4.50 | 1.65             | 0.000 | <i>MGAM</i>      | 2.24                                      | 1.11            | 1.80             | 0.000 |
| <i>BPI</i>      | 2.45                                      | 1.70 | 1.82             | 0.000 | <i>MMP8</i>      | 3.01                                      | 1.70            | 1.76             | 0.000 |
| <i>C19orf59</i> | 1.64                                      | 0.39 | 5.43             | 0.000 | <i>MMP9</i>      | 3.29                                      | 0.79            | 1.59             | 0.000 |
| <i>C5orf32</i>  | 1.88                                      | 0.39 | 3.42             | 0.000 | <i>MPO</i>       | 2.32                                      | 1.91            | 1.91             | 0.000 |
| <i>CA1</i>      | 2.84                                      | 4.50 | 1.41             | 0.149 | <i>MS4A3</i>     | 2.12                                      | 1.70            | 2.08             | 0.000 |
| <i>CCDC125</i>  | 1.70                                      | 0.79 | 3.04             | 0.000 | <i>NA</i>        | 2.32                                      | 0.39            | 2.88             | 0.000 |
| <i>CD177</i>    | 3.27                                      | 0.62 | 1.68             | 0.000 | <i>NLRC4</i>     | 1.65                                      | 0.79            | 3.58             | 0.000 |
| <i>CD24</i>     | 2.36                                      | 1.01 | 2.02             | 0.000 | <i>NTNG2</i>     | 1.50                                      | 1.91            | 3.45             | 0.000 |
| <i>CEACAM1</i>  | 2.69                                      | 1.01 | 1.80             | 0.000 | <i>OLFM4</i>     | 2.85                                      | 2.21            | 1.69             | 0.000 |
| <i>CEACAM6</i>  | 2.40                                      | 2.59 | 1.80             | 0.000 | <i>PADI2</i>     | 1.72                                      | 0.79            | 3.79             | 0.000 |
| <i>CEACAM8</i>  | 2.51                                      | 2.34 | 1.77             | 0.000 | <i>PADI4</i>     | 1.90                                      | 0.62            | 2.94             | 0.000 |
| <i>CHI3L1</i>   | 3.58                                      | 0.39 | 1.71             | 0.000 | <i>PGLYRP1</i>   | 2.51                                      | 1.11            | 1.90             | 0.000 |
| <i>CPNE2</i>    | 1.54                                      | 0.39 | 6.66             | 0.000 | <i>PLD1</i>      | 1.65                                      | 0.39            | 7.57             | 0.000 |
| <i>CRISP3</i>   | 3.42                                      | 1.06 | 1.59             | 0.000 | <i>PRTN3</i>     | 2.37                                      | 0.62            | 2.04             | 0.000 |
| <i>CTSG</i>     | 2.44                                      | 1.91 | 1.87             | 0.000 | <i>RNASE2</i>    | 1.74                                      | 0.39            | 6.41             | 0.000 |
| <i>CYP4F3</i>   | 2.89                                      | 0.62 | 1.70             | 0.000 | <i>RNASE3</i>    | 2.16                                      | 1.51            | 2.10             | 0.000 |
| <i>DCAF12</i>   | 1.93                                      | 1.51 | 1.77             | 0.000 | <i>RRAGD</i>     | 1.69                                      | 0.39            | 5.33             | 0.000 |
| <i>DEFA4</i>    | 2.33                                      | 4.01 | 1.83             | 0.000 | <i>S100P</i>     | 2.30                                      | 1.06            | 2.06             | 0.000 |
| <i>EIF1AY</i>   | 1.52                                      | 5.00 | 1.84             | 0.085 | <i>SELENBP1</i>  | 2.81                                      | 2.59            | 1.40             | 0.000 |
| <i>ELANE</i>    | 2.55                                      | 1.11 | 1.89             | 0.000 | <i>SEPX1</i>     | 1.56                                      | 0.39            | 5.20             | 0.000 |
| <i>EPB49</i>    | 1.51                                      | 9.97 | 1.74             | 0.542 | <i>SERPINB10</i> | 2.73                                      | 0.62            | 2.05             | 0.000 |
| <i>FAM151B</i>  | 1.54                                      | 0.39 | 4.92             | 0.000 | <i>SIGLEC5</i>   | 1.68                                      | 0.62            | 2.68             | 0.255 |
| <i>FAM46C</i>   | 1.67                                      | 6.43 | 1.67             | 0.085 | <i>SLC25A37</i>  | 1.99                                      | 1.51            | 1.76             | 0.000 |
| <i>FAR2</i>     | 1.69                                      | 0.62 | 3.53             | 0.000 | <i>SLC25A39</i>  | 1.90                                      | 2.59            | 1.69             | 0.000 |
| <i>FCAR</i>     | 1.58                                      | 0.79 | 3.63             | 0.000 | <i>SLC4A1</i>    | 3.28                                      | 2.59            | 1.36             | 0.000 |
| <i>GCA</i>      | 1.60                                      | 0.39 | 5.76             | 0.000 | <i>SNCA</i>      | 1.72                                      | 2.59            | 1.71             | 0.367 |
| <i>GMPR</i>     | 1.52                                      | 7.61 | 1.74             | 1.544 | <i>TCN1</i>      | 2.76                                      | 1.11            | 1.79             | 0.000 |
| <i>GSN</i>      | 1.54                                      | 0.39 | 4.49             | 0.000 | <i>TRIM58</i>    | 1.57                                      | 4.50            | 1.93             | 0.085 |
| <i>GYPC</i>     | 1.55                                      | 4.50 | 1.94             | 0.000 | <i>UGCG</i>      | 1.89                                      | 0.39            | 3.25             | 0.000 |
| <i>HBD</i>      | 2.27                                      | 2.34 | 1.52             | 0.000 | <i>VSTM1</i>     | 1.66                                      | 2.98            | 2.98             | 0.085 |
| <i>HIST1H1B</i> | 1.62                                      | 0.79 | 5.24             | 0.000 | <i>YOD1</i>      | 1.61                                      | 2.59            | 1.98             | 0.000 |

**Downexpressed common elements in samples with  $\geq 5$  CTCs and shortest survival**

|  | Expression in $\geq 5$ CTCs vs $< 5$ CTCS |       | Overall survival |      |  | Expression in $\geq 5$ CTCs vs $< 5$ CTCS |              | Overall survival |      |
|--|-------------------------------------------|-------|------------------|------|--|-------------------------------------------|--------------|------------------|------|
|  | FC                                        | FDR   | HR               | FDR  |  | FC                                        | FDR          | HR               | FDR  |
|  | <i>ADAMTS10</i>                           | -1.52 | 2.59             | 0.23 |  | 0.542                                     | <i>KLRC3</i> | -1.69            | 2.98 |

|                |       |      |      |       |               |       |      |      |       |
|----------------|-------|------|------|-------|---------------|-------|------|------|-------|
| <i>C1orf21</i> | -1.50 | 2.98 | 0.33 | 0.255 | <i>KLRC4</i>  | -1.63 | 2.98 | 0.44 | 0.754 |
| <i>CD160</i>   | -1.81 | 2.59 | 0.40 | 0.367 | <i>KLRD1</i>  | -1.59 | 2.59 | 0.40 | 0.542 |
| <i>CD3G</i>    | -1.50 | 2.98 | 0.37 | 0.255 | <i>KLRF1</i>  | -1.67 | 2.59 | 0.38 | 0.367 |
| <i>FCRL6</i>   | -1.57 | 3.36 | 0.44 | 0.754 | <i>KLRK1</i>  | -1.54 | 2.59 | 0.25 | 0.149 |
| <i>FGFBP2</i>  | -1.52 | 3.50 | 0.50 | 1.544 | <i>MYBL1</i>  | -1.56 | 2.98 | 0.32 | 0.149 |
| <i>GNLY</i>    | -1.50 | 4.50 | 0.48 | 0.754 | <i>PTCH1</i>  | -1.55 | 2.59 | 0.36 | 0.754 |
| <i>GPR56</i>   | -1.60 | 2.98 | 0.47 | 0.367 | <i>PTGDR</i>  | -1.56 | 3.50 | 0.50 | 1.125 |
| <i>GZMH</i>    | -1.60 | 3.36 | 0.48 | 0.754 | <i>PVALB</i>  | -1.73 | 5.47 | 0.50 | 0.367 |
| <i>IKZF2</i>   | -1.67 | 2.59 | 0.23 | 0.097 | <i>SAMD3</i>  | -1.58 | 2.98 | 0.31 | 0.149 |
| <i>KLRB1</i>   | -1.50 | 3.50 | 0.27 | 0.097 | <i>TGFBR3</i> | -1.62 | 2.98 | 0.39 | 0.255 |

---
